# Supplementary material
Source: publisher site journal article supplement (https://mbmg.pensoft.net/article/85794/download/suppl/33/)
Supplement: Supplementary file 1

## Sheet: Read_me
			Sheet	Information
			Summary_Species	Summary of the species identified in microscopy dataset, biovolumes and biomass estimations.
			Cell_Counts	Microscopy cell counts for 15 evironmetal samples, species and taxa classification.
			Biomass (pg C)	Biomass estimation for the species identified in the 15 evironmetal samples.
			Size_geometry	Species-specific size, geometric shape and conversion factors used to estimate biomass.
			References	Complete references from Size_geometry sheet

## Sheet: Summary_Species
Species	TAXA	Biovolume (um3 cell-1)	Biomass (mgC cell -1)	Biomass (pg C cell -1)
Actinocyclus	Bacillariophyta (Stramenopiles)	1.5708e+06	3.05102e-05	3051.02
Actinocyclus octonarius	Bacillariophyta (Stramenopiles)	140198	4.29934e-06	429.934
Actinoptychus senarius	Bacillariophyta (Stramenopiles)	24052.8	1.02924e-06	102.924
Akashiwo sanguinea	Dinoflagellata (Alveolata)	28274.3	3.26822e-06	326.822
Asterionellopsis glacialis	Bacillariophyta (Stramenopiles)	1413.72	1.03356e-07	10.3356
Asteroplanus kariana	Bacillariophyta (Stramenopiles)	560	4.87723e-08	4.87723
Bacillaria paxillifer	Bacillariophyta (Stramenopiles)	3315	2.06303e-07	20.6303
Bacteriastrum hyalinum	Bacillariophyta (Stramenopiles)	15708	7.28527e-07	72.8527
Bellerochea horologicalis	Bacillariophyta (Stramenopiles)	151020	4.56655e-06	456.655
Biddulphia alternans	Bacillariophyta (Stramenopiles)	5000	2.8791e-07	28.791
Brockmanniella cf. brockmannii	Bacillariophyta (Stramenopiles)	251.327	2.54675e-08	2.54675
Cerataulina pelagica	Bacillariophyta (Stramenopiles)	49480.1	1.84746e-06	184.746
Cerataulus radiatus	Bacillariophyta (Stramenopiles)	1000	7.80535e-08	7.80535
Ceratoneis cf. closterium	Bacillariophyta (Stramenopiles)	4908.74	2.83641e-07	28.3641
Chaetoceros	Bacillariophyta (Stramenopiles)	329.867	3.17516e-08	3.17516
Chaetoceros contortus	Bacillariophyta (Stramenopiles)	791.681	6.45828e-08	6.45828
Chaetoceros danicus	Bacillariophyta (Stramenopiles)	3534.29	2.17303e-07	21.7303
Chaetoceros debilis	Bacillariophyta (Stramenopiles)	3534.29	2.17303e-07	21.7303
Chaetoceros densus	Bacillariophyta (Stramenopiles)	22383.8	9.70934e-07	97.0934
Chaetoceros didymus	Bacillariophyta (Stramenopiles)	3092.51	1.95e-07	19.5
Chaetoceros eibenii	Bacillariophyta (Stramenopiles)	12475.3	6.0435e-07	60.435
Chaetoceros pseudocurvisetus	Bacillariophyta (Stramenopiles)	6911.5	3.74357e-07	37.4357
Chaetoceros socialis	Bacillariophyta (Stramenopiles)	251.327	2.54675e-08	2.54675
Chaetoceros sp.[solitair]	Bacillariophyta (Stramenopiles)	265.072	2.65914e-08	2.65914
Chaetoceros tenuissimus	Bacillariophyta (Stramenopiles)	44.5	6.25479e-09	0.625479
Chlorophyta >3 µm	Flagellated cells	113.097	1.83082e-08	1.83082
Chlorophyta < 3 µm	Flagellated cells	4.18879	8.29077e-10	0.0829077
Choanoflagellida 7-10 µm	Flagellated cells	220.893	3.43274e-08	3.43274
Choanoflagellida kolonie ~10	Flagellated cells	2208.93	2.98292e-07	29.8292
Chromobiota < 03 µm	Flagellated cells	4.18879	8.29077e-10	0.0829077
Chromobiota 03-10 µm	Flagellated cells	179.594	2.82641e-08	2.82641
Chrysochromulina	Flagellated cells	35.3429	6.142e-09	0.6142
Cochlodinium polykrikoides	Dinoflagellata (Alveolata)	6872.23	1.10302e-06	110.302
Coscinodiscophyceae < 10 µm	Bacillariophyta (Stramenopiles)	49.0874	6.77281e-09	0.677281
Coscinodiscophyceae 10-30 µm	Bacillariophyta (Stramenopiles)	3141.59	1.97506e-07	19.7506
Coscinodiscophyceae 30-50 µm	Bacillariophyta (Stramenopiles)	25132.7	1.06656e-06	106.656
Coscinodiscus radiatus	Bacillariophyta (Stramenopiles)	76969	2.64359e-06	264.359
Cryptomonadales < 10 µm	Flagellated cells	102.625	1.67117e-08	1.67117
Cryptomonadales > 10 µm	Flagellated cells	734.347	1.06056e-07	10.6056
Cyclotella	Bacillariophyta (Stramenopiles)	1767.15	1.2386e-07	12.386
Dactyliosolen fragilissimus	Bacillariophyta (Stramenopiles)	8077.82	4.24823e-07	42.4823
Dactyliosolen phuketensis	Bacillariophyta (Stramenopiles)	4712.39	2.74404e-07	27.4404
Delphineis minutissima	Bacillariophyta (Stramenopiles)	322.537	3.11781e-08	3.11781
Dictyocha (met skeletje)	Flagellated cells	2094.4	2.83745e-07	28.3745
Dictyocha (naakte vorm)	Flagellated cells	2094.4	2.83745e-07	28.3745
Dictyocha crux	Flagellated cells	2094.4	2.83745e-07	28.3745
Diploneis	Bacillariophyta (Stramenopiles)	7000	3.7824e-07	37.824
Ditylum brightwellii	Bacillariophyta (Stramenopiles)	25000	1.06199e-06	106.199
Ebria tripartita	Flagellated cells	4948.01	6.36098e-07	63.6098
Eucampia zodiacus	Bacillariophyta (Stramenopiles)	7853.98	4.15251e-07	41.5251
Eunotogramma dubium	Bacillariophyta (Stramenopiles)	28274.3	1.17347e-06	117.347
Eutreptiella	Flagellated cells	6675.88	8.42689e-07	84.2689
Glenodinium danicum	Dinoflagellata (Alveolata)	2722.71	5.14346e-07	51.4346
Guinardia delicatula	Bacillariophyta (Stramenopiles)	4523.89	2.65469e-07	26.5469
Guinardia flaccida	Bacillariophyta (Stramenopiles)	120264	3.79649e-06	379.649
Guinardia striata	Bacillariophyta (Stramenopiles)	57019.9	2.07267e-06	207.267
Gymnodiniaceae < 10 µm	Dinoflagellata (Alveolata)	78.5398	2.76929e-08	2.76929
Gymnodiniaceae 10-30 µm	Dinoflagellata (Alveolata)	2591.81	4.93882e-07	49.3882
Gymnodiniaceae 30-50 µm	Dinoflagellata (Alveolata)	18967.4	2.54619e-06	254.619
Gymnodinium galeatum (Karlodinium veneficum)	Dinoflagellata (Alveolata)	680.678	1.64119e-07	16.4119
Gymnodinium verruculosum	Dinoflagellata (Alveolata)	1000	2.25327e-07	22.5327
Gyrodinium > 50 µm	Dinoflagellata (Alveolata)	48694.7	5.5373e-06	553.73
Gyrodinium 30-50 µm	Dinoflagellata (Alveolata)	18967.4	2.54619e-06	254.619
Gyrodinium calyptoglyphe	Dinoflagellata (Alveolata)	30000	3.71502e-06	371.502
Gyrodinium flagellare	Dinoflagellata (Alveolata)	30000	3.71502e-06	371.502
Gyrodinium spirale	Dinoflagellata (Alveolata)	13908.1	1.97181e-06	197.181
Halosphaera flagellata	Flagellated cells	65449.8	7.18773e-06	718.773
Heterocapsa minima/rotundata	Dinoflagellata (Alveolata)	234	6.80844e-08	6.80844
Heterocapsa sp.	Dinoflagellata (Alveolata)	234	6.80844e-08	6.80844
Heterocapsa triquetra	Dinoflagellata (Alveolata)	1670.17	3.43849e-07	34.3849
Heterosigma akashiwo	Dinoflagellata (Alveolata)	4188.79	7.33524e-07	73.3524
Karenia mikimotoi	Dinoflagellata (Alveolata)	6842.39	1.09907e-06	109.907
Katodinium glaucum	Dinoflagellata (Alveolata)	3216.99	5.90136e-07	59.0136
Khakista < 10 µm	Bacillariophyta (Stramenopiles)	15.708	2.86821e-09	0.286821
Khakista < 10 µm b. < 50 µm l.	Bacillariophyta (Stramenopiles)	490.874	7.26565e-08	7.26565
Khakista < 10 µm b. > 50 µm l.	Bacillariophyta (Stramenopiles)	1472.62	2.03841e-07	20.3841
Khakista > 10 µm b. > 50 µm l.	Bacillariophyta (Stramenopiles)	23561.9	2.75398e-06	275.398
Lauderia annulata	Bacillariophyta (Stramenopiles)	69115	2.42262e-06	242.262
Lennoxia faveolata	Bacillariophyta (Stramenopiles)	24.0528	3.79768e-09	0.379768
Leptocylindrus danicus	Bacillariophyta (Stramenopiles)	1531.53	1.10288e-07	11.0288
Leptocylindrus minimus	Bacillariophyta (Stramenopiles)	155.509	1.72546e-08	1.72546
Leucocryptos marina	Flagellated cells	65.4498	1.09545e-08	1.09545
Lithodesmium sp.	Bacillariophyta (Stramenopiles)	24000	1.02741e-06	102.741
Lithodesmium undulatum	Bacillariophyta (Stramenopiles)	24000	1.02741e-06	102.741
Mesoporos perforatus	Bacillariophyta (Stramenopiles)	6122.28	7.769e-07	77.69
Meuniera membranacea (Navicula membranacea)	Bacillariophyta (Stramenopiles)	132732	4.11269e-06	411.269
Micromonas pusilla	Flagellated cells	1.0472	2.25559e-10	0.0225559
Minutocellus scriptus	Bacillariophyta (Stramenopiles)	254.469	2.57254e-08	2.57254
Monoraphidium	Flagellated cells	147.262	2.3458e-08	2.3458
Myrionecta rubra	Ciliophora (Alveolata)	65449.8	7.18773e-06	718.773
Navicula	Bacillariophyta (Stramenopiles)	2100	1.42466e-07	14.2466
Navicula distans	Bacillariophyta (Stramenopiles)	2000	1.36939e-07	13.6939
Noctiluca scintillans	Dinoflagellata (Alveolata)	3.43612e+07	0.000372515	37251.5
Oblea	Dinoflagellata (Alveolata)	6.54498e+07	0.0020947	209470
Odontella aurita	Bacillariophyta (Stramenopiles)	12723.5	1.83235e-06	183.235
Odontella longicruris	Bacillariophyta (Stramenopiles)	42333	1.6279e-06	162.79
Odontella rhombus	Bacillariophyta (Stramenopiles)	7838.5	4.14587e-07	41.4587
Odontella sinensis	Bacillariophyta (Stramenopiles)	7838.5	4.14587e-07	41.4587
Oxyphysis oxytoxoides	Dinoflagellata (Alveolata)	3.4047e+06	5.71358e-05	5713.58
Oxytoxum adriaticum	Dinoflagellata (Alveolata)	13404.1	1.91275e-06	191.275
Paralia sulcata	Bacillariophyta (Stramenopiles)	2261.95	4.41476e-07	44.1476
Parlibellus delognei (Navicula sp.)	Bacillariophyta (Stramenopiles)	883.573	7.05984e-08	7.05984
Peridiniales 10-30 µm	Dinoflagellata (Alveolata)	2000	1.36939e-07	13.6939
Phaeocystis cel	Flagellated cells	2094.4	2.83745e-07	28.3745
Phaeocystis flagellaat	Flagellated cells	42.9416	1.591e-08	1.591
Phaeocystis kolonie	Flagellated cells	42.9416	1.08e-08	1.08
Phalacroma rotundata	Dinoflagellata (Alveolata)	42.9416	1.415e-08	1.415
Plagiogrammopsis vanheurckii	Bacillariophyta (Stramenopiles)	41945.2	4.73318e-06	473.318
Plagiolemma distortum	Bacillariophyta (Stramenopiles)	2356.19	3.16928e-07	31.6928
Plagiotropis sp.	Flagellated cells	3534.29	4.63778e-07	46.3778
Pleurosigma	Bacillariophyta (Stramenopiles)	10602.9	1.30115e-06	130.115
Pleurosigmataceae	Bacillariophyta (Stramenopiles)	34083.3	1.36548e-06	136.548
Podosira stelliger	Bacillariophyta (Stramenopiles)	34083.3	1.36548e-06	136.548
Polykrikos	Dinoflagellata (Alveolata)	65459.1	2.31817e-06	231.817
Proboscia alata	Bacillariophyta (Stramenopiles)	178187	1.61263e-05	1612.63
Proboscia indica	Bacillariophyta (Stramenopiles)	64237.1	2.28301e-06	228.301
Prorocentrum	Dinoflagellata (Alveolata)	64237.1	2.28301e-06	228.301
Prorocentrum balticum	Dinoflagellata (Alveolata)	1075.54	2.39263e-07	23.9263
Prorocentrum micans	Dinoflagellata (Alveolata)	1035.31	2.31863e-07	23.1863
Prorocentrum triestinum	Dinoflagellata (Alveolata)	12959.1	1.86026e-06	186.026
Protaspis glans	Flagellated cells	2428.55	4.68102e-07	46.8102
Protoperidinium > 50 µm	Dinoflagellata (Alveolata)	904.779	2.07494e-07	20.7494
Protoperidinium 10-30 µm	Dinoflagellata (Alveolata)	35637.4	4.28139e-06	428.139
Protoperidinium 30-50 µm	Dinoflagellata (Alveolata)	1570.8	3.26901e-07	32.6901
Protoperidinium bipes	Dinoflagellata (Alveolata)	12566.4	1.81369e-06	181.369
Protoperidinium claudicans	Dinoflagellata (Alveolata)	1102.42	2.44179e-07	24.4179
Protoperidinium conicoides	Dinoflagellata (Alveolata)	76739.8	8.05509e-06	805.509
Protoperidinium conicum	Dinoflagellata (Alveolata)	36811.1	4.39724e-06	439.724
Protoperidinium granii	Dinoflagellata (Alveolata)	110447	1.08735e-05	1087.35
Protoperidinium mite	Dinoflagellata (Alveolata)	7162.83	1.14131e-06	114.131
Protoperidinium ovatum	Dinoflagellata (Alveolata)	22216.9	2.90055e-06	290.055
Protoperidinium steinii	Dinoflagellata (Alveolata)	120763	1.17038e-05	1170.38
Protoperidinium subinerme	Dinoflagellata (Alveolata)	10053.1	1.50907e-06	150.907
Pseudo-nitzschia	Bacillariophyta (Stramenopiles)	21868.4	2.86301e-06	286.301
Pseudo-nitzschia delicatissima complex	Bacillariophyta (Stramenopiles)	512	4.53535e-08	4.53535
Pseudo-nitzschia fraudulenta	Bacillariophyta (Stramenopiles)	240	2.45326e-08	2.45326
Pseudo-nitzschia pungens complex	Bacillariophyta (Stramenopiles)	4708	2.74197e-07	27.4197
Pseudo-nitzschia turgidula complex	Bacillariophyta (Stramenopiles)	2640	1.71519e-07	17.1519
Pseudopodosira westii (Melosira sp.)	Bacillariophyta (Stramenopiles)	2000	1.36939e-07	13.6939
Pterosperma phycoma	Flagellated cells	3000	1.90256e-07	19.0256
Pyramimonas < 10 µm	Flagellated cells	1767.15	2.41904e-07	24.1904
Pyramimonas > 10 µm	Flagellated cells	60	1.00957e-08	1.00957
Pyramimonas longicauda	Flagellated cells	367.92	5.54238e-08	5.54238
Raphidophyceae	Flagellated cells	2750	3.66427e-07	36.6427
Rhaphoneis amphiceros	Bacillariophyta (Stramenopiles)	15000	5.35878e-06	535.878
Rhizosolenia hebatata	Bacillariophyta (Stramenopiles)	8232.14	4.31393e-07	43.1393
Rhizosolenia imbricata	Bacillariophyta (Stramenopiles)	47873.9	1.79867e-06	179.867
Rhizosolenia pungens	Bacillariophyta (Stramenopiles)	45935	1.73937e-06	173.937
Rhizosolenia robusta	Bacillariophyta (Stramenopiles)	83939.4	2.83615e-06	283.615
Rhizosolenia setigera	Bacillariophyta (Stramenopiles)	196350	5.64989e-06	564.989
Scrippsiella	Dinoflagellata (Alveolata)	5505	9.18751e-07	91.8751
Skeletonema cf. costatum	Bacillariophyta (Stramenopiles)	23.2333	3.6924e-09	0.36924
Stephanopyxis turris	Bacillariophyta (Stramenopiles)	28260	1.17299e-06	117.299
Telonema subtilis	Flagellated cells	63.3555	1.0625e-08	1.0625
Thalassionema frauenfeldii	Bacillariophyta (Stramenopiles)	500	4.44895e-08	4.44895
Thalassionema nitzschioides	Bacillariophyta (Stramenopiles)	1040	8.05762e-08	8.05762
Thalassiosira < 10 µm	Bacillariophyta (Stramenopiles)	251.327	2.54675e-08	2.54675
Thalassiosira 10-30 µm	Bacillariophyta (Stramenopiles)	3141.59	1.97506e-07	19.7506
Thalassiosira 30-80 µm	Bacillariophyta (Stramenopiles)	56548.7	2.05877e-06	205.877
Thalassiosira anguste-lineata	Bacillariophyta (Stramenopiles)	43186.8	1.65448e-06	165.448
Torodinium robustum	Dinoflagellata (Alveolata)	4838.05	8.26004e-07	82.6004
Tripos fusus	Dinoflagellata (Alveolata)	18000	2.4387e-06	243.87
Tripos horridus [1]	Dinoflagellata (Alveolata)	44278.1	5.12004e-06	512.004
Tryblionella acuminata	Bacillariophyta (Stramenopiles)	5348	3.04057e-07	30.4057
Warnowia sp.	Dinoflagellata (Alveolata)	33510.3	4.06968e-06	406.968

## Sheet: Cell_Counts
Species	TAXA	Sample 1	Sample 2	Sample 3	Sample 4	Sample 5	Sample 6	Sample 7	Sample 8	Sample 9	Sample 10	Sample 11	Sample 12	Sample 13	Sample 14	Sample 15
Actinocyclus	Bacillariophyta (Stramenopiles)	0	800	0	0	0	0	0	0	0	0	0	0	0	0	0
Actinocyclus octonarius	Bacillariophyta (Stramenopiles)	0	0	0	444.444	0	0	0	444.444	0	0	0	0	0	0	0
Actinoptychus senarius	Bacillariophyta (Stramenopiles)	0	0	1600	3200	2400	0	0	444.444	1777.78	0	0	0	0	0	0
Akashiwo sanguinea	Dinoflagellata (Alveolata)	0	0	0	1600	0	0	0	0	0	0	0	0	0	0	0
Asterionellopsis glacialis	Bacillariophyta (Stramenopiles)	4000	0	0	3200	0	0	20444.4	1777.78	13333.3	4800	4800	0	33600	0	0
Asteroplanus kariana	Bacillariophyta (Stramenopiles)	0	0	0	0	0	0	0	6376.53	0	0	0	0	0	0	0
Bacillaria paxillifer	Bacillariophyta (Stramenopiles)	0	0	0	0	10400	0	0	0	0	0	0	0	0	0	0
Bacteriastrum hyalinum	Bacillariophyta (Stramenopiles)	0	0	0	0	3200	0	0	0	0	0	0	0	0	0	0
Bellerochea horologicalis	Bacillariophyta (Stramenopiles)	0	0	36000	12800	64000	0	0	0	0	0	2222.22	0	0	0	0
Biddulphia alternans	Bacillariophyta (Stramenopiles)	0	0	4800	0	0	0	0	0	0	0	0	0	0	0	0
Brockmanniella cf. brockmannii	Bacillariophyta (Stramenopiles)	34433.3	0	51649.9	74605.5	80344.3	45911	6376.53	98836.3	38259.2	0	11477.8	40172.2	97561	6242.2	0
Cerataulina pelagica	Bacillariophyta (Stramenopiles)	0	0	5738.88	0	0	0	0	0	0	28694.4	5738.88	5738.88	5738.88	0	5738.88
Cerataulus radiatus	Bacillariophyta (Stramenopiles)	0	0	0	800	0	444.444	0	0	0	0	0	0	0	0	0
Ceratoneis cf. closterium	Bacillariophyta (Stramenopiles)	5738.88	11477.8	40172.2	0	5738.88	5738.88	6376.53	3188.27	38259.2	0	5738.88	0	5738.88	3121.1	0
Chaetoceros	Bacillariophyta (Stramenopiles)	0	529412	5738.88	5738.88	74605.5	22955.5	3188.27	6376.53	6376.53	11477.8	11477.8	17216.6	5738.88	0	0
Chaetoceros contortus	Bacillariophyta (Stramenopiles)	0	8000	9600	0	0	0	0	0	0	0	0	0	0	0	0
Chaetoceros danicus	Bacillariophyta (Stramenopiles)	0	22955.5	17216.6	0	0	0	0	0	0	0	0	0	0	0	0
Chaetoceros debilis	Bacillariophyta (Stramenopiles)	0	40172.2	0	0	45911	17216.6	0	0	0	22955.5	0	0	0	0	0
Chaetoceros densus	Bacillariophyta (Stramenopiles)	0	0	0	0	0	0	0	0	0	0	0	0	0	444.444	0
Chaetoceros didymus	Bacillariophyta (Stramenopiles)	0	0	0	0	74605.5	0	0	0	0	0	0	0	0	0	0
Chaetoceros eibenii	Bacillariophyta (Stramenopiles)	0	0	0	0	0	0	0	0	0	1600	0	0	0	0	0
Chaetoceros pseudocurvisetus	Bacillariophyta (Stramenopiles)	0	0	0	0	11477.8	0	0	0	0	0	0	0	0	0	0
Chaetoceros socialis	Bacillariophyta (Stramenopiles)	0	0	0	0	0	0	0	0	0	58823.5	58823.5	0	0	0	0
Chaetoceros sp.[solitair]	Bacillariophyta (Stramenopiles)	0	0	0	0	0	0	0	0	0	0	0	0	0	0	5738.88
Chaetoceros tenuissimus	Bacillariophyta (Stramenopiles)	0	0	0	29411.8	0	0	0	0	0	0	0	0	0	0	0
Chlorophyta >3 µm	Flagellated cells	0	0	29411.8	147059	88235.3	29411.8	0	0	0	0	0	0	0	0	0
Chlorophyta < 3 µm	Flagellated cells	266667	5.6e+06	800000	6.13333e+06	3.46667e+06	2.93333e+06	2.66667e+06	3.55556e+06	3.55556e+06	533333	2.93333e+06	1.6e+06	1.86667e+06	592593	533333
Choanoflagellida 7-10 µm	Flagellated cells	147059	117647	29411.8	58823.5	0	58823.5	16339.9	16339.9	32679.7	176471	58823.5	852941	676471	14716.7	117647
Choanoflagellida kolonie ~10	Flagellated cells	0	0	0	0	0	0	0	0	0	0	0	1.44118e+06	0	0	0
Chromobiota < 03 µm	Flagellated cells	0	1.33333e+06	0	0	0	1.6e+06	0	592593	592593	0	800000	0	2.4e+06	518519	2.4e+06
Chromobiota 03-10 µm	Flagellated cells	117647	117647	117647	29411.8	2.66667e+06	176471	686275	555556	2.22222e+06	382353	29411.8	235294	3.46667e+06	1.18519e+06	852941
Chrysochromulina	Flagellated cells	29411.8	0	88235.3	0	88235.3	0	130719	49019.6	0	205882	88235.3	58823.5	235294	176600	441176
Cochlodinium polykrikoides	Dinoflagellata (Alveolata)	0	0	0	0	800	0	0	0	0	0	0	0	0	0	0
Coscinodiscophyceae < 10 µm	Bacillariophyta (Stramenopiles)	0	235294	88235.3	0	88235.3	58823.5	326797	163399	310458	117647	58823.5	0	176471	44150.1	0
Coscinodiscophyceae 10-30 µm	Bacillariophyta (Stramenopiles)	0	5738.88	9564.8	0	0	0	0	0	28694.4	0	0	0	0	3121.1	5738.88
Coscinodiscophyceae 30-50 µm	Bacillariophyta (Stramenopiles)	0	0	0	0	800	0	0	0	0	0	0	0	0	0	0
Coscinodiscus radiatus	Bacillariophyta (Stramenopiles)	0	0	0	0	0	0	0	0	0	444.444	0	0	0	444.444	0
Cryptomonadales < 10 µm	Flagellated cells	0	235294	323529	352941	294118	117647	81699.3	147059	196078	29411.8	29411.8	58823.5	0	14716.7	29411.8
Cryptomonadales > 10 µm	Flagellated cells	11477.8	411765	63127.7	114778	34433.3	11477.8	12753.1	35070.9	98836.3	40172.2	17216.6	11477.8	11477.8	6242.2	22955.5
Cyclotella	Bacillariophyta (Stramenopiles)	0	17216.6	0	0	0	0	0	0	0	0	0	0	0	0	0
Dactyliosolen fragilissimus	Bacillariophyta (Stramenopiles)	0	0	11477.8	0	5738.88	0	0	0	0	0	0	0	0	0	0
Dactyliosolen phuketensis	Bacillariophyta (Stramenopiles)	0	1600	0	0	0	0	0	0	0	3200	1600	0	0	0	0
Delphineis minutissima	Bacillariophyta (Stramenopiles)	58823.5	58823.5	470588	441176	235294	1.02941e+06	114379	310458	32679.7	29411.8	29411.8	0	58823.5	103017	0
Dictyocha (met skeletje)	Flagellated cells	0	0	0	0	800	0	0	0	0	0	0	0	0	0	0
Dictyocha (naakte vorm)	Flagellated cells	0	0	5738.88	5738.88	5738.88	0	0	0	0	0	0	0	0	0	0
Dictyocha crux	Flagellated cells	0	0	0	0	9600	0	0	0	0	0	0	0	0	0	0
Diploneis	Bacillariophyta (Stramenopiles)	0	0	5738.88	0	0	0	0	0	0	0	0	0	5738.88	3121.1	0
Ditylum brightwellii	Bacillariophyta (Stramenopiles)	0	0	444.444	0	0	0	444.444	0	0	1600	1333.33	0	0	0	0
Ebria tripartita	Flagellated cells	0	0	800	0	0	0	0	0	0	0	0	0	1600	0	0
Eucampia zodiacus	Bacillariophyta (Stramenopiles)	0	12000	131994	183644	1600	0	0	0	0	0	0	0	0	0	0
Eunotogramma dubium	Bacillariophyta (Stramenopiles)	0	0	0	0	0	0	0	0	0	0	0	0	11477.8	0	0
Eutreptiella	Flagellated cells	0	17216.6	0	0	28694.4	1600	0	0	0	0	0	0	0	0	0
Glenodinium danicum	Dinoflagellata (Alveolata)	0	0	11477.8	0	0	0	0	0	0	0	0	0	0	0	0
Guinardia delicatula	Bacillariophyta (Stramenopiles)	0	131994	5600	1600	16000	5600	0	0	0	3200	1600	5600	5600	0	120516
Guinardia flaccida	Bacillariophyta (Stramenopiles)	1600	74605.5	2400	0	2400	1600	0	0	0	444.444	444.444	1777.78	800	0	4000
Guinardia striata	Bacillariophyta (Stramenopiles)	0	0	2400	0	1600	0	0	0	0	0	0	0	0	0	0
Gymnodiniaceae < 10 µm	Dinoflagellata (Alveolata)	0	0	0	0	29411.8	0	0	32679.7	0	0	0	176471	58823.5	0	147059
Gymnodiniaceae 10-30 µm	Dinoflagellata (Alveolata)	5738.88	28694.4	45911	51650	51649.9	22955.5	15941.3	9564.8	3188.27	5738.88	17217	11477.8	22955.5	24968.8	11477.8
Gymnodiniaceae 30-50 µm	Dinoflagellata (Alveolata)	0	0	0	0	0	0	0	0	0	0	0	0	0	0	800
Gymnodinium galeatum (Karlodinium veneficum)	Dinoflagellata (Alveolata)	0	17216.6	0	11477.8	5738.88	0	0	0	0	0	0	0	0	3121.1	11477.8
Gymnodinium verruculosum	Dinoflagellata (Alveolata)	0	11477.8	11477.8	5738.88	11477.8	11477.8	6376.53	0	3188.27	0	0	0	0	444.444	0
Gyrodinium > 50 µm	Dinoflagellata (Alveolata)	0	1600	0	0	0	0	0	0	0	0	0	0	0	0	0
Gyrodinium 30-50 µm	Dinoflagellata (Alveolata)	7200	0	0	800	800	0	0	0	444.444	1600	0	0	800	0	1600
Gyrodinium calyptoglyphe	Dinoflagellata (Alveolata)	5738.88	0	0	0	0	0	0	0	0	0	0	0	0	0	0
Gyrodinium flagellare	Dinoflagellata (Alveolata)	0	0	0	0	0	0	0	0	0	0	0	0	88235.3	0	0
Gyrodinium spirale	Dinoflagellata (Alveolata)	800	800	800	800	1600	800	888.889	0	0	800	444.444	800	800	0	0
Halosphaera flagellata	Flagellated cells	0	0	0	5738.88	0	0	0	0	0	0	0	0	0	0	0
Heterocapsa minima/rotundata	Dinoflagellata (Alveolata)	0	5738.88	5738.88	5738.88	0	0	3188.27	3188.27	3188.27	0	0	0	0	0	0
Heterocapsa sp.	Dinoflagellata (Alveolata)	0	0	0	0	0	5738.88	0	0	0	0	0	0	0	0	0
Heterocapsa triquetra	Dinoflagellata (Alveolata)	0	800	0	0	0	0	0	0	0	0	0	0	0	0	0
Heterosigma akashiwo	Dinoflagellata (Alveolata)	0	11477.8	0	0	0	0	0	0	0	0	0	0	0	0	5738.88
Karenia mikimotoi	Dinoflagellata (Alveolata)	0	0	0	0	4000	800	0	0	0	0	0	0	0	0	0
Katodinium glaucum	Dinoflagellata (Alveolata)	4800	0	0	0	0	800	0	0	1777.78	4800	3200	3200	3200	0	8800
Khakista < 10 µm	Bacillariophyta (Stramenopiles)	0	0	0	0	88235.3	0	16339.9	49019.6	0	0	0	0	0	0	58823.5
Khakista < 10 µm b. < 50 µm l.	Bacillariophyta (Stramenopiles)	0	0	88235.3	0	0	0	0	0	0	0	0	0	0	0	0
Khakista < 10 µm b. > 50 µm l.	Bacillariophyta (Stramenopiles)	0	0	0	0	88235.3	28694.4	0	32679.7	9564.8	0	0	0	5738.88	6242.2	444.444
Khakista > 10 µm b. > 50 µm l.	Bacillariophyta (Stramenopiles)	0	0	0	1600	0	0	0	0	0	0	0	0	0	0	0
Lauderia annulata	Bacillariophyta (Stramenopiles)	0	0	0	0	5600	0	0	0	0	33600	0	0	0	0	0
Lennoxia faveolata	Bacillariophyta (Stramenopiles)	0	0	0	0	29411.8	0	0	0	0	0	0	0	0	0	29411.8
Leptocylindrus danicus	Bacillariophyta (Stramenopiles)	0	0	34433.3	40172.2	34433.3	5738.88	0	0	0	0	0	0	5738.88	0	1.61765e+06
Leptocylindrus minimus	Bacillariophyta (Stramenopiles)	0	58823.5	411765	205882	29411.8	88235.3	0	0	0	0	0	0	0	0	0
Leucocryptos marina	Flagellated cells	5738.88	17216.6	17216.6	63127.7	63127.7	28694.4	3188.27	0	12753.1	0	5738.88	5738.88	5738.88	3121.1	45911
Lithodesmium sp.	Bacillariophyta (Stramenopiles)	0	0	17216.6	0	800	0	0	0	0	0	0	0	0	0	0
Lithodesmium undulatum	Bacillariophyta (Stramenopiles)	0	0	0	0	0	0	0	0	0	0	0	0	1333.33	0	0
Mesoporos perforatus	Bacillariophyta (Stramenopiles)	0	0	5738.88	0	5738.88	0	0	0	0	0	0	0	0	0	0
Meuniera membranacea (Navicula membranacea)	Bacillariophyta (Stramenopiles)	0	0	0	2400	0	0	0	0	0	15200	4000	1333.33	0	0	0
Micromonas pusilla	Flagellated cells	0	0	0	0	0	0	592593	0	0	0	0	0	0	0	0
Minutocellus scriptus	Bacillariophyta (Stramenopiles)	0	0	1.08824e+06	117647	58823.5	0	16339.9	16339.9	0	0	0	0	0	0	0
Monoraphidium	Flagellated cells	0	0	0	0	0	0	0	0	0	0	0	0	5738.88	0	0
Myrionecta rubra	Ciliophora (Alveolata)	0	3200	0	800	800	0	0	0	0	800	0	800	0	0	0
Navicula	Bacillariophyta (Stramenopiles)	800	4000	800	800	800	2400	0	0	0	0	0	0	0	888.889	800
Navicula distans	Bacillariophyta (Stramenopiles)	0	0	0	0	0	800	0	0	0	0	0	0	0	0	0
Noctiluca scintillans	Dinoflagellata (Alveolata)	0	444.444	0	0	0	0	0	0	0	0	0	0	0	0	444.444
Oblea	Dinoflagellata (Alveolata)	0	0	0	0	0	0	0	0	0	0	0	0	0	0	800
Odontella aurita	Bacillariophyta (Stramenopiles)	0	0	5738.88	28694.4	5738.88	2400	0	9564.8	6376.53	0	0	0	3200	3121.1	0
Odontella longicruris	Bacillariophyta (Stramenopiles)	0	0	1600	0	1600	2400	0	0	888.889	0	800	800	1600	0	0
Odontella rhombus	Bacillariophyta (Stramenopiles)	0	0	0	800	1333.33	0	0	0	444.444	0	0	0	0	0	0
Odontella sinensis	Bacillariophyta (Stramenopiles)	0	0	0	0	1777.78	888.889	444.444	0	0	0	0	0	0	0	0
Oxyphysis oxytoxoides	Dinoflagellata (Alveolata)	0	0	0	0	1600	0	0	0	0	0	0	0	0	0	0
Oxytoxum adriaticum	Dinoflagellata (Alveolata)	0	0	0	0	1600	0	0	0	0	0	0	0	0	0	0
Paralia sulcata	Bacillariophyta (Stramenopiles)	12800	19200	7200	4800	5600	7111.11	0	25333.3	12444.4	19200	0	3200	27200	0	0
Parlibellus delognei (Navicula sp.)	Bacillariophyta (Stramenopiles)	0	800	0	0	0	0	0	0	0	0	0	0	0	0	0
Peridiniales 10-30 µm	Dinoflagellata (Alveolata)	0	0	5738.88	0	5738.88	0	0	0	0	5738.88	0	0	5738.88	0	0
Phaeocystis cel	Flagellated cells	1.17333e+07	235294	0	0	0	29411.8	0	0	0	8.53333e+06	2.02667e+07	1.44e+07	1.11765e+06	14716.7	0
Phaeocystis flagellaat	Flagellated cells	3.2e+06	235294	88235.3	29411.8	58823.5	29411.8	0	0	49019.6	294118	3.2e+06	3.73333e+06	2.44118e+06	632818	88235.3
Phaeocystis kolonie	Flagellated cells	476327	8800	0	0	0	0	0	0	0	2.26112e+06	196800	3.54663e+06	112800	0	0
Phalacroma rotundata	Dinoflagellata (Alveolata)	0	0	800	0	0	800	0	0	0	0	0	0	0	0	0
Plagiogrammopsis vanheurckii	Bacillariophyta (Stramenopiles)	0	0	0	5738.88	0	4000	0	22317.9	19129.6	0	0	0	1600	0	0
Plagiolemma distortum	Bacillariophyta (Stramenopiles)	0	0	0	800	800	0	0	0	0	0	0	0	0	0	0
Plagiotropis sp.	Flagellated cells	0	0	0	0	0	800	0	0	0	0	0	0	0	0	0
Pleurosigma	Bacillariophyta (Stramenopiles)	800	800	2400	3200	800	444.444	0	0	0	0	0	0	0	0	0
Pleurosigmataceae	Bacillariophyta (Stramenopiles)	0	0	2400	1600	0	800	444.444	888.889	1333.33	0	444.444	1600	888.889	1333.33	444.444
Podosira stelliger	Bacillariophyta (Stramenopiles)	0	0	0	0	888.889	0	0	888.889	0	444.444	1600	0	0	0	0
Polykrikos	Dinoflagellata (Alveolata)	0	444.444	0	0	0	0	0	0	0	0	0	0	0	0	0
Proboscia alata	Bacillariophyta (Stramenopiles)	0	0	2400	0	0	0	0	0	0	0	0	0	0	0	0
Proboscia indica	Bacillariophyta (Stramenopiles)	0	0	0	0	0	1600	0	0	0	0	0	0	0	0	0
Prorocentrum	Dinoflagellata (Alveolata)	0	0	17600	0	0	0	0	0	0	0	0	0	0	0	0
Prorocentrum balticum	Dinoflagellata (Alveolata)	0	0	5738.88	0	0	0	0	0	0	0	0	0	0	0	0
Prorocentrum micans	Dinoflagellata (Alveolata)	0	2400	0	0	0	0	0	0	0	0	0	0	0	0	0
Prorocentrum triestinum	Dinoflagellata (Alveolata)	0	11477.8	0	0	5738.88	800	0	0	0	0	0	0	0	0	0
Protaspis glans	Flagellated cells	0	0	0	0	0	0	0	3188.27	0	5738.88	0	0	0	0	0
Protoperidinium > 50 µm	Dinoflagellata (Alveolata)	0	0	0	0	0	0	0	0	0	0	444.444	0	0	0	0
Protoperidinium 10-30 µm	Dinoflagellata (Alveolata)	0	0	0	0	5738.88	0	0	0	0	0	0	0	0	0	0
Protoperidinium 30-50 µm	Dinoflagellata (Alveolata)	0	1600	0	0	0	0	0	0	0	444.444	0	0	800	0	0
Protoperidinium bipes	Dinoflagellata (Alveolata)	0	0	800	0	0	0	0	0	0	0	0	0	15200	0	1600
Protoperidinium claudicans	Dinoflagellata (Alveolata)	0	0	0	0	800	0	0	0	0	0	0	0	0	0	0
Protoperidinium conicoides	Dinoflagellata (Alveolata)	0	0	0	0	0	0	0	0	0	0	0	0	800	0	0
Protoperidinium conicum	Dinoflagellata (Alveolata)	0	0	800	0	0	0	0	0	0	0	0	0	0	0	0
Protoperidinium granii	Dinoflagellata (Alveolata)	0	0	0	800	0	0	0	0	0	0	0	0	0	0	0
Protoperidinium mite	Dinoflagellata (Alveolata)	0	0	800	0	0	0	0	0	0	0	0	0	0	0	0
Protoperidinium ovatum	Dinoflagellata (Alveolata)	0	0	0	0	0	0	0	0	0	888.889	0	444.444	0	0	0
Protoperidinium steinii	Dinoflagellata (Alveolata)	0	0	4800	1600	1600	2400	0	0	0	0	0	0	0	0	0
Protoperidinium subinerme	Dinoflagellata (Alveolata)	0	800	0	0	0	0	0	0	0	0	0	0	0	0	0
Pseudo-nitzschia	Bacillariophyta (Stramenopiles)	0	2400	6400	1600	0	4800	888.889	0	0	8000	800	0	0	0	800
Pseudo-nitzschia delicatissima complex	Bacillariophyta (Stramenopiles)	294118	147059	0	0	29411.8	0	32679.7	16339.9	16339.9	441176	58823.5	264706	1.14706e+06	397351	29411.8
Pseudo-nitzschia fraudulenta	Bacillariophyta (Stramenopiles)	0	0	1600	0	0	0	0	0	0	0	0	0	0	0	2400
Pseudo-nitzschia pungens complex	Bacillariophyta (Stramenopiles)	3200	3200	3200	0	3200	0	0	0	0	3200	14400	16000	55200	0	0
Pseudo-nitzschia turgidula complex	Bacillariophyta (Stramenopiles)	0	0	0	0	0	0	0	6376.53	0	0	0	0	0	0	0
Pseudopodosira westii (Melosira sp.)	Bacillariophyta (Stramenopiles)	0	0	0	0	800	0	0	0	0	0	0	0	0	0	0
Pterosperma phycoma	Flagellated cells	0	0	0	0	0	5738.88	0	3188.27	0	0	0	0	0	3121.1	0
Pyramimonas < 10 µm	Flagellated cells	0	0	58823.5	29411.8	29411.8	0	0	0	0	0	0	0	29411.8	0	0
Pyramimonas > 10 µm	Flagellated cells	0	0	0	0	0	5738.88	0	0	0	0	0	0	0	0	0
Pyramimonas longicauda	Flagellated cells	0	0	5738.88	5738.88	0	0	0	0	0	0	0	0	0	0	0
Raphidophyceae	Flagellated cells	0	5738.88	17216.6	0	0	0	0	0	0	0	0	0	0	0	0
Rhaphoneis amphiceros	Bacillariophyta (Stramenopiles)	0	0	0	0	0	0	4444.44	0	888.889	0	0	0	800	2400	0
Rhizosolenia hebatata	Bacillariophyta (Stramenopiles)	5738.88	0	0	0	0	0	0	0	0	0	0	0	0	0	0
Rhizosolenia imbricata	Bacillariophyta (Stramenopiles)	17600	2400	0	0	5600	2400	888.889	0	0	18400	63127.7	63127.7	1600	1777.78	9600
Rhizosolenia pungens	Bacillariophyta (Stramenopiles)	0	0	800	0	800	444.444	0	0	0	0	0	0	0	0	0
Rhizosolenia robusta	Bacillariophyta (Stramenopiles)	0	0	444.444	444.444	0	0	0	0	0	0	0	0	0	0	0
Rhizosolenia setigera	Bacillariophyta (Stramenopiles)	0	800	68866.6	0	0	4000	0	0	0	6400	800	1600	7200	444.444	8800
Scrippsiella	Dinoflagellata (Alveolata)	0	6400	2400	800	0	0	0	0	0	0	800	0	0	0	0
Skeletonema cf. costatum	Bacillariophyta (Stramenopiles)	0	58823.5	88235.3	58823.5	88235.3	176471	0	0	212418	0	0	29411.8	58823.5	0	88235.3
Stephanopyxis turris	Bacillariophyta (Stramenopiles)	0	0	3111.11	10400	4000	0	0	0	0	0	0	0	0	0	0
Telonema subtilis	Flagellated cells	29411.8	29411.8	0	0	0	0	0	0	0	0	0	0	176471	0	0
Thalassionema frauenfeldii	Bacillariophyta (Stramenopiles)	0	0	0	0	2400	6400	1777.78	1333.33	0	0	0	0	0	0	0
Thalassionema nitzschioides	Bacillariophyta (Stramenopiles)	0	0	0	0	0	0	0	1777.78	888.889	28800	24000	4000	15200	7555.56	0
Thalassiosira < 10 µm	Bacillariophyta (Stramenopiles)	29411.8	29411.8	88235.3	58823.5	29411.8	0	0	0	555556	0	29411.8	0	176471	0	0
Thalassiosira 10-30 µm	Bacillariophyta (Stramenopiles)	0	0	28694.4	11477.8	97561	17216.6	3188.27	6376.53	41447.5	40172.2	11477.8	5738.88	40172.2	3121.1	0
Thalassiosira 30-80 µm	Bacillariophyta (Stramenopiles)	800	800	3200	0	10400	800	888.889	0	0	0	0	0	800	0	0
Thalassiosira anguste-lineata	Bacillariophyta (Stramenopiles)	0	0	0	1600	3200	0	0	0	0	0	0	0	0	0	0
Torodinium robustum	Dinoflagellata (Alveolata)	800	1600	800	0	0	800	444.444	444.444	0	800	800	800	800	444.444	2400
Tripos fusus	Dinoflagellata (Alveolata)	0	2400	0	0	0	0	0	0	0	0	0	0	0	0	0
Tripos horridus [1]	Dinoflagellata (Alveolata)	0	0	0	0	444.444	0	0	0	0	0	0	0	0	0	0
Tryblionella acuminata	Bacillariophyta (Stramenopiles)	0	0	0	0	0	0	0	3188.27	0	0	0	0	0	0	0
Warnowia sp.	Dinoflagellata (Alveolata)	0	0	0	0	0	0	888.889	0	0	800	0	0	0	0	0

## Sheet: Biomass (pg C)
Species	TAXA	Sample 1	Sample 2	Sample 3	Sample 4	Sample 5	Sample 6	Sample 7	Sample 8	Sample 9	Sample 10	Sample 11	Sample 12	Sample 13	Sample 14	Sample 15
Actinocyclus	Bacillariophyta (Stramenopiles)	0	2.44082e+07	0	0	0	0	0	0	0	0	0	0	0	0	0
Actinocyclus octonarius	Bacillariophyta (Stramenopiles)	0	0	0	1.91082e+06	0	0	0	1.91082e+06	0	0	0	0	0	0	0
Actinoptychus senarius	Bacillariophyta (Stramenopiles)	0	0	1.64679e+06	3.29358e+06	2.47018e+06	0	0	457442	1.82977e+06	0	0	0	0	0	0
Asterionellopsis glacialis	Bacillariophyta (Stramenopiles)	413425	0	0	330740	0	0	2.11306e+06	183744	1.37808e+06	496110	496110	0	3.47277e+06	0	0
Asteroplanus kariana	Bacillariophyta (Stramenopiles)	0	0	0	0	0	0	0	310998	0	0	0	0	0	0	0
Bacillaria paxillifer	Bacillariophyta (Stramenopiles)	0	0	0	0	2.14555e+06	0	0	0	0	0	0	0	0	0	0
Bacteriastrum hyalinum	Bacillariophyta (Stramenopiles)	0	0	0	0	2.33129e+06	0	0	0	0	0	0	0	0	0	0
Bellerochea horologicalis	Bacillariophyta (Stramenopiles)	0	0	1.64396e+08	5.84518e+07	2.92259e+08	0	0	0	0	0	1.01479e+07	0	0	0	0
Biddulphia alternans	Bacillariophyta (Stramenopiles)	0	0	1.38197e+06	0	0	0	0	0	0	0	0	0	0	0	0
Brockmanniella cf. brockmannii	Bacillariophyta (Stramenopiles)	876931	0	1.3154e+06	1.90002e+06	2.04617e+06	1.16924e+06	162395	2.51712e+06	974368	0	292310	1.02309e+06	2.48464e+06	158973	0
Cerataulina pelagica	Bacillariophyta (Stramenopiles)	0	0	1.06024e+07	0	0	0	0	0	0	5.30118e+07	1.06024e+07	1.06024e+07	1.06024e+07	0	1.06024e+07
Cerataulus radiatus	Bacillariophyta (Stramenopiles)	0	0	0	62442.8	0	34690.5	0	0	0	0	0	0	0	0	0
Ceratoneis cf. closterium	Bacillariophyta (Stramenopiles)	1.62778e+06	3.25556e+06	1.13945e+07	0	1.62778e+06	1.62778e+06	1.80865e+06	904323	1.08519e+07	0	1.62778e+06	0	1.62778e+06	885272	0
Chaetoceros	Bacillariophyta (Stramenopiles)	0	1.68097e+07	182219	182219	2.36884e+06	728875	101233	202465	202465	364437	364437	546656	182219	0	0
Chaetoceros contortus	Bacillariophyta (Stramenopiles)	0	516662	619995	0	0	0	0	0	0	0	0	0	0	0	0
Chaetoceros danicus	Bacillariophyta (Stramenopiles)	0	4.9883e+06	3.74123e+06	0	0	0	0	0	0	0	0	0	0	0	0
Chaetoceros debilis	Bacillariophyta (Stramenopiles)	0	8.72953e+06	0	0	9.97661e+06	3.74123e+06	0	0	0	4.9883e+06	0	0	0	0	0
Chaetoceros densus	Bacillariophyta (Stramenopiles)	0	0	0	0	0	0	0	0	0	0	0	0	0	431526	0
Chaetoceros didymus	Bacillariophyta (Stramenopiles)	0	0	0	0	1.45481e+07	0	0	0	0	0	0	0	0	0	0
Chaetoceros eibenii	Bacillariophyta (Stramenopiles)	0	0	0	0	0	0	0	0	0	966961	0	0	0	0	0
Chaetoceros pseudocurvisetus	Bacillariophyta (Stramenopiles)	0	0	0	0	4.29678e+06	0	0	0	0	0	0	0	0	0	0
Chaetoceros socialis	Bacillariophyta (Stramenopiles)	0	0	0	0	0	0	0	0	0	1.49809e+06	1.49809e+06	0	0	0	0
Chaetoceros sp.[solitair]	Bacillariophyta (Stramenopiles)	0	0	0	0	0	0	0	0	0	0	0	0	0	0	152605
Chaetoceros tenuissimus	Bacillariophyta (Stramenopiles)	0	0	0	183964	0	0	0	0	0	0	0	0	0	0	0
Coscinodiscophyceae < 10 µm	Bacillariophyta (Stramenopiles)	0	1.5936e+06	597601	0	597601	398401	2.21334e+06	1.10667e+06	2.10267e+06	796802	398401	0	1.1952e+06	299020	0
Coscinodiscophyceae 10-30 µm	Bacillariophyta (Stramenopiles)	0	1.13347e+06	1.88911e+06	0	0	0	0	0	5.66733e+06	0	0	0	0	616437	1.13347e+06
Coscinodiscophyceae 30-50 µm	Bacillariophyta (Stramenopiles)	0	0	0	0	853251	0	0	0	0	0	0	0	0	0	0
Coscinodiscus radiatus	Bacillariophyta (Stramenopiles)	0	0	0	0	0	0	0	0	0	1.17493e+06	0	0	0	1.17493e+06	0
Cyclotella	Bacillariophyta (Stramenopiles)	0	2.13245e+06	0	0	0	0	0	0	0	0	0	0	0	0	0
Dactyliosolen fragilissimus	Bacillariophyta (Stramenopiles)	0	0	4.87602e+06	0	2.43801e+06	0	0	0	0	0	0	0	0	0	0
Dactyliosolen phuketensis	Bacillariophyta (Stramenopiles)	0	439047	0	0	0	0	0	0	0	878094	439047	0	0	0	0
Delphineis minutissima	Bacillariophyta (Stramenopiles)	1.83401e+06	1.83401e+06	1.46721e+07	1.37551e+07	7.33604e+06	3.20952e+07	3.56613e+06	9.67949e+06	1.01889e+06	917004	917004	0	1.83401e+06	3.21188e+06	0
Diploneis	Bacillariophyta (Stramenopiles)	0	0	2.17067e+06	0	0	0	0	0	0	0	0	0	2.17067e+06	1.18052e+06	0
Ditylum brightwellii	Bacillariophyta (Stramenopiles)	0	0	471997	0	0	0	471997	0	0	1.69919e+06	1.41599e+06	0	0	0	0
Eucampia zodiacus	Bacillariophyta (Stramenopiles)	0	4.98301e+06	5.48107e+07	7.62584e+07	664401	0	0	0	0	0	0	0	0	0	0
Eunotogramma dubium	Bacillariophyta (Stramenopiles)	0	0	0	0	0	0	0	0	0	0	0	0	1.34688e+07	0	0
Guinardia delicatula	Bacillariophyta (Stramenopiles)	0	3.50403e+07	1.48662e+06	424750	4.2475e+06	1.48662e+06	0	0	0	849499	424750	1.48662e+06	1.48662e+06	0	3.19933e+07
Guinardia flaccida	Bacillariophyta (Stramenopiles)	6.07439e+06	2.83239e+08	9.11159e+06	0	9.11159e+06	6.07439e+06	0	0	0	1.68733e+06	1.68733e+06	6.74932e+06	3.0372e+06	0	1.5186e+07
Guinardia striata	Bacillariophyta (Stramenopiles)	0	0	4.97441e+06	0	3.31627e+06	0	0	0	0	0	0	0	0	0	0
Khakista < 10 µm	Bacillariophyta (Stramenopiles)	0	0	0	0	237185	0	43923.2	131770	0	0	0	0	0	0	158124
Khakista < 10 µm b. < 50 µm l.	Bacillariophyta (Stramenopiles)	0	0	3.86733e+06	0	0	0	0	0	0	0	0	0	0	0	0
Khakista < 10 µm b. > 50 µm l.	Bacillariophyta (Stramenopiles)	0	0	0	0	9.42664e+06	3.06557e+06	0	3.49135e+06	1.02186e+06	0	0	0	613115	666886	47482.3
Khakista > 10 µm b. > 50 µm l.	Bacillariophyta (Stramenopiles)	0	0	0	1.61948e+06	0	0	0	0	0	0	0	0	0	0	0
Lauderia annulata	Bacillariophyta (Stramenopiles)	0	0	0	0	1.35667e+07	0	0	0	0	8.14001e+07	0	0	0	0	0
Lennoxia faveolata	Bacillariophyta (Stramenopiles)	0	0	0	0	111696	0	0	0	0	0	0	0	0	0	111696
Leptocylindrus danicus	Bacillariophyta (Stramenopiles)	0	0	3.79758e+06	4.43051e+06	3.79758e+06	632930	0	0	0	0	0	0	632930	0	1.78407e+08
Leptocylindrus minimus	Bacillariophyta (Stramenopiles)	0	1.01498e+06	7.10485e+06	3.55243e+06	507489	1.52247e+06	0	0	0	0	0	0	0	0	0
Lithodesmium sp.	Bacillariophyta (Stramenopiles)	0	0	1.76886e+07	0	821928	0	0	0	0	0	0	0	0	0	0
Lithodesmium undulatum	Bacillariophyta (Stramenopiles)	0	0	0	0	0	0	0	0	0	0	0	0	1.36988e+06	0	0
Mesoporos perforatus	Bacillariophyta (Stramenopiles)	0	0	1.94718e+06	0	1.94718e+06	0	0	0	0	0	0	0	0	0	0
Meuniera membranacea (Navicula membranacea)	Bacillariophyta (Stramenopiles)	0	0	0	9.87047e+06	0	0	0	0	0	6.2513e+07	1.64508e+07	5.48359e+06	0	0	0
Minutocellus scriptus	Bacillariophyta (Stramenopiles)	0	0	2.79953e+07	3.02652e+06	1.51326e+06	0	420350	420350	0	0	0	0	0	0	0
Navicula	Bacillariophyta (Stramenopiles)	113973	569865	113973	113973	113973	341919	0	0	0	0	0	0	0	126637	113973
Navicula distans	Bacillariophyta (Stramenopiles)	0	0	0	0	0	109551	0	0	0	0	0	0	0	0	0
Odontella aurita	Bacillariophyta (Stramenopiles)	0	0	9.34235e+06	4.67117e+07	9.34235e+06	3.90697e+06	0	1.55706e+07	1.03804e+07	0	0	0	5.20929e+06	5.08085e+06	0
Odontella longicruris	Bacillariophyta (Stramenopiles)	0	0	663339	0	663339	995008	0	0	368522	0	331669	331669	663339	0	0
Odontella rhombus	Bacillariophyta (Stramenopiles)	0	0	0	331669	552782	0	0	0	184261	0	0	0	0	0	0
Odontella sinensis	Bacillariophyta (Stramenopiles)	0	0	0	0	1.01575e+08	5.07874e+07	2.53937e+07	0	0	0	0	0	0	0	0
Paralia sulcata	Bacillariophyta (Stramenopiles)	903660	1.35549e+06	508309	338872	395351	502033	0	1.78849e+06	878558	1.35549e+06	0	225915	1.92028e+06	0	0
Parlibellus delognei (Navicula sp.)	Bacillariophyta (Stramenopiles)	0	109551	0	0	0	0	0	0	0	0	0	0	0	0	0
Plagiogrammopsis vanheurckii	Bacillariophyta (Stramenopiles)	0	0	0	897600	0	625627	0	3.49067e+06	2.992e+06	0	0	0	250251	0	0
Plagiolemma distortum	Bacillariophyta (Stramenopiles)	0	0	0	173842	173842	0	0	0	0	0	0	0	0	0	0
Pleurosigma	Bacillariophyta (Stramenopiles)	1.09238e+06	1.09238e+06	3.27714e+06	4.36952e+06	1.09238e+06	606878	0	0	0	0	0	0	0	0	0
Pleurosigmataceae	Bacillariophyta (Stramenopiles)	0	0	3.27714e+06	2.18476e+06	0	1.09238e+06	606878	1.21376e+06	1.82063e+06	0	606878	2.18476e+06	1.21376e+06	1.82063e+06	606878
Podosira stelliger	Bacillariophyta (Stramenopiles)	0	0	0	0	2.06059e+06	0	0	2.06059e+06	0	1.0303e+06	3.70906e+06	0	0	0	0
Proboscia alata	Bacillariophyta (Stramenopiles)	0	0	5.47921e+06	0	0	0	0	0	0	0	0	0	0	0	0
Proboscia indica	Bacillariophyta (Stramenopiles)	0	0	0	0	0	3.65281e+06	0	0	0	0	0	0	0	0	0
Pseudo-nitzschia	Bacillariophyta (Stramenopiles)	0	108848	290262	72565.5	0	217697	40314.2	0	0	362828	36282.8	0	0	0	36282.8
Pseudo-nitzschia delicatissima complex	Bacillariophyta (Stramenopiles)	7.21547e+06	3.60774e+06	0	0	721547	0	801719	400860	400860	1.08232e+07	1.44309e+06	6.49393e+06	2.81404e+07	9.74806e+06	721547
Pseudo-nitzschia fraudulenta	Bacillariophyta (Stramenopiles)	0	0	438715	0	0	0	0	0	0	0	0	0	0	0	658073
Pseudo-nitzschia pungens complex	Bacillariophyta (Stramenopiles)	548862	548862	548862	0	548862	0	0	0	0	548862	2.46988e+06	2.74431e+06	9.46787e+06	0	0
Pseudo-nitzschia turgidula complex	Bacillariophyta (Stramenopiles)	0	0	0	0	0	0	0	873198	0	0	0	0	0	0	0
Pseudopodosira westii (Melosira sp.)	Bacillariophyta (Stramenopiles)	0	0	0	0	152205	0	0	0	0	0	0	0	0	0	0
Rhaphoneis amphiceros	Bacillariophyta (Stramenopiles)	0	0	0	0	0	0	1.9173e+06	0	383461	0	0	0	345115	1.03534e+06	0
Rhizosolenia hebatata	Bacillariophyta (Stramenopiles)	1.03224e+07	0	0	0	0	0	0	0	0	0	0	0	0	0	0
Rhizosolenia imbricata	Bacillariophyta (Stramenopiles)	3.06128e+07	4.17448e+06	0	0	9.74045e+06	4.17448e+06	1.5461e+06	0	0	3.20043e+07	1.09802e+08	1.09802e+08	2.78299e+06	3.09221e+06	1.66979e+07
Rhizosolenia pungens	Bacillariophyta (Stramenopiles)	0	0	2.26892e+06	0	2.26892e+06	1.26051e+06	0	0	0	0	0	0	0	0	0
Rhizosolenia robusta	Bacillariophyta (Stramenopiles)	0	0	1.65562e+08	1.65562e+08	0	0	0	0	0	0	0	0	0	0	0
Rhizosolenia setigera	Bacillariophyta (Stramenopiles)	0	4.51991e+06	3.89088e+08	0	0	2.25995e+07	0	0	0	3.61593e+07	4.51991e+06	9.03982e+06	4.06792e+07	2.51106e+06	4.9719e+07
Skeletonema cf. costatum	Bacillariophyta (Stramenopiles)	0	217200	325800	217200	325800	651599	0	0	784332	0	0	108600	217200	0	325800
Stephanopyxis turris	Bacillariophyta (Stramenopiles)	0	0	3.64929e+06	1.21991e+07	4.69195e+06	0	0	0	0	0	0	0	0	0	0
Thalassionema frauenfeldii	Bacillariophyta (Stramenopiles)	0	0	0	0	106775	284733	79092.4	59319.3	0	0	0	0	0	0	0
Thalassionema nitzschioides	Bacillariophyta (Stramenopiles)	0	0	0	0	0	0	0	143246	71623.2	2.32059e+06	1.93383e+06	322305	1.22476e+06	608798	0
Thalassiosira < 10 µm	Bacillariophyta (Stramenopiles)	749045	749045	2.24714e+06	1.49809e+06	749045	0	0	0	1.41486e+07	0	749045	0	4.49427e+06	0	0
Thalassiosira 10-30 µm	Bacillariophyta (Stramenopiles)	0	0	5.66733e+06	2.26693e+06	1.92689e+07	3.4004e+06	629703	1.25941e+06	8.18614e+06	7.93426e+06	2.26693e+06	1.13347e+06	7.93426e+06	616437	0
Thalassiosira 30-80 µm	Bacillariophyta (Stramenopiles)	1.64701e+06	1.64701e+06	6.58805e+06	0	2.14112e+07	1.64701e+06	1.83001e+06	0	0	0	0	0	1.64701e+06	0	0
Thalassiosira anguste-lineata	Bacillariophyta (Stramenopiles)	0	0	0	2.64717e+06	5.29435e+06	0	0	0	0	0	0	0	0	0	0
Tryblionella acuminata	Bacillariophyta (Stramenopiles)	0	0	0	0	0	0	0	969417	0	0	0	0	0	0	0
Myrionecta rubra	Ciliophora (Alveolata)	0	2.93215e+07	0	7.33038e+06	7.33038e+06	0	0	0	0	7.33038e+06	0	7.33038e+06	0	0	0
Akashiwo sanguinea	Dinoflagellata (Alveolata)	0	0	0	5.37804e+06	0	0	0	0	0	0	0	0	0	0	0
Cochlodinium polykrikoides	Dinoflagellata (Alveolata)	0	0	0	0	844281	0	0	0	0	0	0	0	0	0	0
Glenodinium danicum	Dinoflagellata (Alveolata)	0	0	5.67463e+06	0	0	0	0	0	0	0	0	0	0	0	0
Gymnodiniaceae < 10 µm	Dinoflagellata (Alveolata)	0	0	0	0	796917	0	0	885464	0	0	0	4.7815e+06	1.59383e+06	0	3.98459e+06
Gymnodiniaceae 10-30 µm	Dinoflagellata (Alveolata)	2.7251e+06	1.36255e+07	2.18008e+07	2.45259e+07	2.45259e+07	1.09004e+07	7.56972e+06	4.54183e+06	1.51394e+06	2.7251e+06	8.17547e+06	5.4502e+06	1.09004e+07	1.18564e+07	5.4502e+06
Gymnodiniaceae 30-50 µm	Dinoflagellata (Alveolata)	0	0	0	0	0	0	0	0	0	0	0	0	0	0	1.93906e+06
Gymnodinium galeatum (Karlodinium veneficum)	Dinoflagellata (Alveolata)	0	2.7349e+06	0	1.82327e+06	911634	0	0	0	0	0	0	0	0	495793	1.82327e+06
Gymnodinium verruculosum	Dinoflagellata (Alveolata)	0	2.49845e+06	2.49845e+06	1.24923e+06	2.49845e+06	2.49845e+06	1.38803e+06	0	694014	0	0	0	0	96745.6	0
Gyrodinium > 50 µm	Dinoflagellata (Alveolata)	0	8.39423e+06	0	0	0	0	0	0	0	0	0	0	0	0	0
Gyrodinium 30-50 µm	Dinoflagellata (Alveolata)	1.74515e+07	0	0	1.93906e+06	1.93906e+06	0	0	0	1.07726e+06	3.87812e+06	0	0	1.93906e+06	0	3.87812e+06
Gyrodinium calyptoglyphe	Dinoflagellata (Alveolata)	2.0249e+07	0	0	0	0	0	0	0	0	0	0	0	0	0	0
Gyrodinium flagellare	Dinoflagellata (Alveolata)	0	0	0	0	0	0	0	0	0	0	0	0	3.11328e+08	0	0
Gyrodinium spirale	Dinoflagellata (Alveolata)	1.50397e+06	1.50397e+06	1.50397e+06	1.50397e+06	3.00794e+06	1.50397e+06	1.67108e+06	0	0	1.50397e+06	835540	1.50397e+06	1.50397e+06	0	0
Heterocapsa minima/rotundata	Dinoflagellata (Alveolata)	0	380214	380214	380214	0	0	211230	211230	211230	0	0	0	0	0	0
Heterocapsa sp.	Dinoflagellata (Alveolata)	0	0	0	0	0	380214	0	0	0	0	0	0	0	0	0
Heterocapsa triquetra	Dinoflagellata (Alveolata)	0	265060	0	0	0	0	0	0	0	0	0	0	0	0	0
Heterosigma akashiwo	Dinoflagellata (Alveolata)	0	8.07535e+06	0	0	0	0	0	0	0	0	0	0	0	0	4.03768e+06
Karenia mikimotoi	Dinoflagellata (Alveolata)	0	0	0	0	4.20638e+06	841276	0	0	0	0	0	0	0	0	0
Katodinium glaucum	Dinoflagellata (Alveolata)	2.72055e+06	0	0	0	0	453425	0	0	1.00761e+06	2.72055e+06	1.8137e+06	1.8137e+06	1.8137e+06	0	4.98767e+06
Noctiluca scintillans	Dinoflagellata (Alveolata)	0	8.50864e+08	0	0	0	0	0	0	0	0	0	0	0	0	8.50864e+08
Oblea	Dinoflagellata (Alveolata)	0	0	0	0	0	0	0	0	0	0	0	0	0	0	1.39822e+06
Oxyphysis oxytoxoides	Dinoflagellata (Alveolata)	0	0	0	0	2.91838e+06	0	0	0	0	0	0	0	0	0	0
Oxytoxum adriaticum	Dinoflagellata (Alveolata)	0	0	0	0	679602	0	0	0	0	0	0	0	0	0	0
Peridiniales 10-30 µm	Dinoflagellata (Alveolata)	0	0	2.28869e+06	0	2.28869e+06	0	0	0	0	2.28869e+06	0	0	2.28869e+06	0	0
Phalacroma rotundata	Dinoflagellata (Alveolata)	0	0	3.71433e+06	0	0	3.71433e+06	0	0	0	0	0	0	0	0	0
Polykrikos	Dinoflagellata (Alveolata)	0	6.74682e+06	0	0	0	0	0	0	0	0	0	0	0	0	0
Prorocentrum	Dinoflagellata (Alveolata)	0	0	4.06658e+06	0	0	0	0	0	0	0	0	0	0	0	0
Prorocentrum balticum	Dinoflagellata (Alveolata)	0	0	1.28524e+06	0	0	0	0	0	0	0	0	0	0	0	0
Prorocentrum micans	Dinoflagellata (Alveolata)	0	4.25817e+06	0	0	0	0	0	0	0	0	0	0	0	0	0
Prorocentrum triestinum	Dinoflagellata (Alveolata)	0	5.16738e+06	0	0	2.58369e+06	360166	0	0	0	0	0	0	0	0	0
Protoperidinium > 50 µm	Dinoflagellata (Alveolata)	0	0	0	0	0	0	0	0	0	0	1.80569e+06	0	0	0	0
Protoperidinium 10-30 µm	Dinoflagellata (Alveolata)	0	0	0	0	1.80827e+06	0	0	0	0	0	0	0	0	0	0
Protoperidinium 30-50 µm	Dinoflagellata (Alveolata)	0	2.76813e+06	0	0	0	0	0	0	0	768925	0	0	1.38406e+06	0	0
Protoperidinium bipes	Dinoflagellata (Alveolata)	0	0	188619	0	0	0	0	0	0	0	0	0	3.58377e+06	0	377239
Protoperidinium claudicans	Dinoflagellata (Alveolata)	0	0	0	0	6.09166e+06	0	0	0	0	0	0	0	0	0	0
Protoperidinium conicoides	Dinoflagellata (Alveolata)	0	0	0	0	0	0	0	0	0	0	0	0	3.33764e+06	0	0
Protoperidinium conicum	Dinoflagellata (Alveolata)	0	0	8.20815e+06	0	0	0	0	0	0	0	0	0	0	0	0
Protoperidinium granii	Dinoflagellata (Alveolata)	0	0	0	873410	0	0	0	0	0	0	0	0	0	0	0
Protoperidinium mite	Dinoflagellata (Alveolata)	0	0	2.20718e+06	0	0	0	0	0	0	0	0	0	0	0	0
Protoperidinium ovatum	Dinoflagellata (Alveolata)	0	0	0	0	0	0	0	0	0	9.81216e+06	0	4.90608e+06	0	0	0
Protoperidinium steinii	Dinoflagellata (Alveolata)	0	0	6.91733e+06	2.30578e+06	2.30578e+06	3.45866e+06	0	0	0	0	0	0	0	0	0
Protoperidinium subinerme	Dinoflagellata (Alveolata)	0	2.17878e+06	0	0	0	0	0	0	0	0	0	0	0	0	0
Scrippsiella	Dinoflagellata (Alveolata)	0	5.63214e+06	2.11205e+06	704018	0	0	0	0	0	0	704018	0	0	0	0
Torodinium robustum	Dinoflagellata (Alveolata)	633357	1.26671e+06	633357	0	0	633357	351865	351865	0	633357	633357	633357	633357	351865	1.90007e+06
Tripos fusus	Dinoflagellata (Alveolata)	0	5.57305e+06	0	0	0	0	0	0	0	0	0	0	0	0	0
Tripos horridus [1]	Dinoflagellata (Alveolata)	0	0	0	0	2.15705e+06	0	0	0	0	0	0	0	0	0	0
Warnowia sp.	Dinoflagellata (Alveolata)	0	0	0	0	0	0	3.43386e+06	0	0	3.09047e+06	0	0	0	0	0
Chlorophyta >3 µm	Flagellated cells	0	0	538476	2.69238e+06	1.61543e+06	538476	0	0	0	0	0	0	0	0	0
Chlorophyta < 3 µm	Flagellated cells	221087	4.64283e+06	663262	5.08501e+06	2.87413e+06	2.43196e+06	2.21087e+06	2.94783e+06	2.94783e+06	442174	2.43196e+06	1.32652e+06	1.54761e+06	491305	442174
Choanoflagellida 7-10 µm	Flagellated cells	5.04815e+06	4.03852e+06	1.00963e+06	2.01926e+06	0	2.01926e+06	560905	560905	1.12181e+06	6.05778e+06	2.01926e+06	2.92793e+07	2.32215e+07	505186	4.03852e+06
Choanoflagellida kolonie ~10	Flagellated cells	0	0	0	0	0	0	0	0	0	0	0	4.29891e+08	0	0	0
Chromobiota < 03 µm	Flagellated cells	0	1.10544e+06	0	0	0	1.32652e+06	0	491305	491305	0	663262	0	1.98979e+06	429892	1.98979e+06
Chromobiota 03-10 µm	Flagellated cells	3.32518e+06	3.32518e+06	3.32518e+06	831296	7.53708e+07	4.98778e+06	1.93969e+07	1.57023e+07	6.2809e+07	1.08068e+07	831296	6.65037e+06	9.79821e+07	3.34982e+07	2.41076e+07
Chrysochromulina	Flagellated cells	180647	0	541941	0	541941	0	802876	301078	0	1.26453e+06	541941	361294	1.44518e+06	1.08468e+06	2.70971e+06
Cryptomonadales < 10 µm	Flagellated cells	0	3.93218e+06	5.40674e+06	5.89826e+06	4.91522e+06	1.96609e+06	1.36534e+06	2.45761e+06	3.27681e+06	491522	491522	983044	0	245942	491522
Cryptomonadales > 10 µm	Flagellated cells	1.21729e+06	4.36701e+07	6.69507e+06	1.21729e+07	3.65186e+06	1.21729e+06	1.35254e+06	3.71948e+06	1.04822e+07	4.2605e+06	1.82593e+06	1.21729e+06	1.21729e+06	662022	2.43457e+06
Dictyocha (met skeletje)	Flagellated cells	0	0	0	0	226996	0	0	0	0	0	0	0	0	0	0
Dictyocha (naakte vorm)	Flagellated cells	0	0	1.62838e+06	1.62838e+06	1.62838e+06	0	0	0	0	0	0	0	0	0	0
Dictyocha crux	Flagellated cells	0	0	0	0	2.72395e+06	0	0	0	0	0	0	0	0	0	0
Ebria tripartita	Flagellated cells	0	0	508878	0	0	0	0	0	0	0	0	0	1.01776e+06	0	0
Eutreptiella	Flagellated cells	0	1.45083e+07	0	0	2.41805e+07	1.3483e+06	0	0	0	0	0	0	0	0	0
Halosphaera flagellata	Flagellated cells	0	0	0	4.12495e+07	0	0	0	0	0	0	0	0	0	0	0
Leucocryptos marina	Flagellated cells	62866.5	188599	188599	691531	691531	314332	34925.8	0	139703	0	62866.5	62866.5	62866.5	34190	502932
Micromonas pusilla	Flagellated cells	0	0	0	0	0	0	133665	0	0	0	0	0	0	0	0
Monoraphidium	Flagellated cells	0	0	0	0	0	0	0	0	0	0	0	0	134623	0	0
Phaeocystis cel	Flagellated cells	1.86677e+08	3.74353e+06	0	0	0	467941	0	0	0	1.35765e+08	3.22443e+08	2.29104e+08	1.77818e+07	234143	0
Phaeocystis flagellaat	Flagellated cells	3.456e+07	2.54118e+06	952941	317647	635294	317647	0	0	529412	3.17647e+06	3.456e+07	4.032e+07	2.63647e+07	6.83444e+06	952941
Phaeocystis kolonie	Flagellated cells	6.74003e+06	124520	0	0	0	0	0	0	0	3.19948e+07	2784720	5.01848e+07	1596120	0	0
Plagiotropis sp.	Flagellated cells	0	0	0	0	0	1.04092e+06	0	0	0	0	0	0	0	0	0
Protaspis glans	Flagellated cells	0	0	0	0	0	0	0	411341	0	740413	0	0	0	0	0
Pterosperma phycoma	Flagellated cells	0	0	0	0	0	1.38826e+06	0	771254	0	0	0	0	0	755005	0
Pyramimonas < 10 µm	Flagellated cells	0	0	593867	296933	296933	0	0	0	0	0	0	0	296933	0	0
Pyramimonas > 10 µm	Flagellated cells	0	0	0	0	0	318071	0	0	0	0	0	0	0	0	0
Pyramimonas longicauda	Flagellated cells	0	0	2.10288e+06	2.10288e+06	0	0	0	0	0	0	0	0	0	0	0
Raphidophyceae	Flagellated cells	0	1.03426e+07	3.10279e+07	0	0	0	0	0	0	0	0	0	0	0	0
Telonema subtilis	Flagellated cells	312500	312500	0	0	0	0	0	0	0	0	0	0	1.875e+06	0	0

## Sheet: Size_geometry
Species	Trophy	TAXA	Lenght (µm)	Width (µm) or Ø2	Ø (µm)	Size-Range	Reference of Size	Reference of North Sea	Shape	Equation for biovolumes (Vp)	Biovolume (um3 cell-1)	Aproximation for Biomass (Menden-Deuer et al. 2000)	Biomass (pgC cell -1)	Biomass (mgC cell -1)
Actinocyclus	AU	Bacillariophyta (Stramenopiles)	200		100	50-300x20-120	Kraberg et al., 2010	Hendey et al. 1964	cylinder	π/4 * d2 * h	1.5708e+06	0,288*Vp^0,811	30510.2	3.05102e-05
Actinocyclus octonarius	AU	Bacillariophyta (Stramenopiles)	42.25		65	60-70	Olenina et al., 2006		cylinder	π/4 * d2 * h	140198	0,288*Vp^0,811	4299.34	4.29934e-06
Actinoptychus senarius	AU	Bacillariophyta (Stramenopiles)	25		35	30-40	Olenina et al., 2006		cylinder	π/4 * d2 * h	24052.8	0,288*Vp^0,811	1029.24	1.02924e-06
Akashiwo sanguinea	CM	Dinoflagellata (Alveolata)	60	30	30	40-80	Kraberg et al., 2010	Daugbjerg et al., 2000	flattened ellipsoid	π/6 * d1 * d2 * h	28274.3	0,76*Vp^0,818	3361.27	3.36127e-06
Asterionellopsis glacialis	AU	Bacillariophyta (Stramenopiles)	90		10	10x90	Olenina et al., 2006		(cone + half sphere)-40%	π/12 * d2 * h*0,6	1413.72	0,288*Vp^0,811	103.356	1.03356e-07
Asteroplanus kariana	AU	Bacillariophyta (Stramenopiles)	35	4	4	4x30-40	Olenina et al., 2006		parallelepiped	l * w * h	560	0,288*Vp^0,811	48.7723	4.87723e-08
Bacillaria paxillifer	AU	Bacillariophyta (Stramenopiles)	85	6.5	6	68-102	Gmekin, 1797		parallelepiped	l * w * h	3315	0,288*Vp^0,811	206.303	2.06303e-07
Bacteriastrum hyalinum	AU	Bacillariophyta (Stramenopiles)	50		20		Bosak et al., 2015		cylinder	π/4 * d2 * h	15708	0,288*Vp^0,811	728.527	7.28527e-07
Bellerochea horologicalis	AU	Bacillariophyta (Stramenopiles)					Nohe et al., 2018		fixed volumes		151020	0,288*Vp^0,811	4566.55	4.56655e-06
Biddulphia alternans	AU	Bacillariophyta (Stramenopiles)					Nohe et al., 2018		fixed volumes		5000	0,288*Vp^0,811	287.91	2.8791e-07
Brockmanniella cf. brockmannii	AU	Bacillariophyta (Stramenopiles)	20	4	4		Hasle et al., 1996		cylinder	π/4 * d2 * h	251.327	0,288*Vp^0,811	25.4675	2.54675e-08
Cerataulina pelagica	AU	Bacillariophyta (Stramenopiles)	70		30	21-40x50-130	Olenina et al., 2006		cylinder	π/4 * d2 * h	49480.1	0,288*Vp^0,811	1847.46	1.84746e-06
Cerataulus radiatus	AU	Bacillariophyta (Stramenopiles)					Nohe et al., 2018		fixed volumes		1000	0,288*Vp^0,811	78.0535	7.80535e-08
Ceratoneis cf. closterium	AU	Bacillariophyta (Stramenopiles)	250		5	Lenght 25-400um, width 2.5 - 8um	Kraberg et al., 2010		cylinder	π/4 * d2 * h	4908.74	0,288*Vp^0,811	283.641	2.83641e-07
Chaetoceros	AU	Bacillariophyta (Stramenopiles)	12	5	7	6-8x11-13	Olenina et al., 2006		oval cylinder	π/4 * d1 * d2 * h	329.867	0,288*Vp^0,811	31.7516	3.17516e-08
Chaetoceros contortus	AU	Bacillariophyta (Stramenopiles)	12	12	7	7-12x12	Olenina et al., 2006		oval cylinder	π/4 * d1 * d2 * h	791.681	0,288*Vp^0,811	64.5828	6.45828e-08
Chaetoceros danicus	AU	Bacillariophyta (Stramenopiles)	15	20	15	20x14-17	Olenina et al., 2006		oval cylinder	π/4 * d1 * d2 * h	3534.29	0,288*Vp^0,811	217.303	2.17303e-07
Chaetoceros debilis	AU	Bacillariophyta (Stramenopiles)	15	20	15	15-20x15	Olenina et al., 2006		oval cylinder	π/4 * d1 * d2 * h	3534.29	0,288*Vp^0,811	217.303	2.17303e-07
Chaetoceros densus	AU	Bacillariophyta (Stramenopiles)	30	25	38	12-45x10-55x8-46	Kraberg et al., 2010	Hendey et al. 1954; Rines & Hargraves, 1990	oval cylinder	π/4 * d1 * d2 * h	22383.8	0,288*Vp^0,811	970.934	9.70934e-07
Chaetoceros didymus	AU	Bacillariophyta (Stramenopiles)	18	17.5	12.5	25-35x18-25	Olenina et al., 2006		oval cylinder	π/4 * d1 * d2 * h	3092.51	0,288*Vp^0,811	195	1.95e-07
Chaetoceros eibenii	AU	Bacillariophyta (Stramenopiles)	19	22	38	8-30x10-55x7-37	Kraberg et al., 2010	Hendey et al. 1954; Rines & Hargraves, 1990	oval cylinder	π/4 * d1 * d2 * h	12475.3	0,288*Vp^0,811	604.35	6.0435e-07
Chaetoceros pseudocurvisetus	AU	Bacillariophyta (Stramenopiles)	20	22	20	10-40x6-30	Kraberg et al., 2010	Kociolek et al., 2020	oval cylinder	π/4 * d1 * d2 * h	6911.5	0,288*Vp^0,811	374.357	3.74357e-07
Chaetoceros socialis	AU	Bacillariophyta (Stramenopiles)	10	8	4	8x9-11	Olenina et al., 2006		oval cylinder	π/4 * d1 * d2 * h	251.327	0,288*Vp^0,811	25.4675	2.54675e-08
Chaetoceros sp.[solitair]	AU	Bacillariophyta (Stramenopiles)	7.5	7.5	6	5-10x5-10	Olenina et al., 2006		oval cylinder	π/4 * d1 * d2 * h	265.072	0,288*Vp^0,811	26.5914	2.65914e-08
Chaetoceros tenuissimus	AU	Bacillariophyta (Stramenopiles)					Nohe et al., 2018		fixed volumes	π/4 * d2 * h	44.5	0,288*Vp^0,811	6.25479	6.25479e-09
Chlorophyta >3 µm	AU	Flagellated cells			6	>3	Adjusted		Sphere	π/6 * d3	113.097	0,216*Vp^0,939	18.3082	1.83082e-08
Chlorophyta < 3 µm	AU	Flagellated cells			2	<3	Adjusted		Sphere	π/6 * d3	4.18879	0,216*Vp^0,939	0.829077	8.29077e-10
Choanoflagellida 7-10 µm	HET	Flagellated cells	7.5		7.5		Adjusted		Sphere	π/6 * d4	220.893	0,216*Vp^0,939	34.3274	3.43274e-08
Choanoflagellida kolonie ~10	HET	Flagellated cells			7.5		Adjusted		Sphere*10	π/6 * d5	2208.93	0,216*Vp^0,939	298.292	2.98292e-07
Chromobiota < 03 µm	CM	Flagellated cells			2	<3	Adjusted		Sphere	π/6 * d3	4.18879	0,216*Vp^0,939	0.829077	8.29077e-10
Chromobiota 03-10 µm	CM	Flagellated cells			7	3-10	Adjusted		Sphere	π/6 * d3	179.594	0,216*Vp^0,939	28.2641	2.82641e-08
Chrysochromulina	AU	Flagellated cells	5	5	2.7	4-6	Olenina et al., 2006		flatenned elipsoid	π/6 * d1 * d2 * h	35.3429	0,216*Vp^0,939	6.142	6.142e-09
Cochlodinium polykrikoides	CM	Dinoflagellata (Alveolata)	35	25	10	30-40 µm in length to 20-30 µm in width	Marine Species Identification Portal, 2021		oval cylinder	π/4 * d1 * d2 * h	6872.23	0,76*Vp^0,819	1055.35	1.05535e-06
Coscinodiscophyceae < 10 µm	AU	Bacillariophyta (Stramenopiles)	2.5		5		Adjusted		cylinder	π/4 * d2 * h	49.0874	0,288*Vp^0,811	6.77281	6.77281e-09
Coscinodiscophyceae 10-30 µm	AU	Bacillariophyta (Stramenopiles)	10		20		Adjusted		cylinder	π/4 * d2 * h	3141.59	0,288*Vp^0,811	197.506	1.97506e-07
Coscinodiscophyceae 30-50 µm	AU	Bacillariophyta (Stramenopiles)	20		40		Adjusted		cylinder	π/4 * d2 * h	25132.7	0,288*Vp^0,811	1066.56	1.06656e-06
Coscinodiscus radiatus	AU	Bacillariophyta (Stramenopiles)	80		35	70-90	Olenina et al., 2006		cylinder	π/4 * d2 * h	76969	0,288*Vp^0,811	2643.59	2.64359e-06
Cryptomonadales < 10 µm	CM	Flagellated cells	7	5.6	5	< 10 µm	Olenina et al., 2006		flattened ellipsoid	π/6 * d1 * d2 * h	102.625	0,216*Vp^0,939	16.7117	1.67117e-08
Cryptomonadales > 10 µm	CM	Flagellated cells	17	11	7.5	>10 µm	Olenina et al., 2006		flattened ellipsoid	π/6 * d1 * d2 * h	734.347	0,216*Vp^0,939	106.056	1.06056e-07
Cyclotella	AU	Bacillariophyta (Stramenopiles)	10		15	7-17	Olenina et al., 2006		cylinder	π/4 * d2 * h	1767.15	0,288*Vp^0,811	123.86	1.2386e-07
Dactyliosolen fragilissimus	AU	Bacillariophyta (Stramenopiles)	85		11	10-12x80-100	Olenina et al., 2006		cylinder	π/4 * d2 * h	8077.82	0,288*Vp^0,811	424.823	4.24823e-07
Dactyliosolen phuketensis	AU	Bacillariophyta (Stramenopiles)	60		10		Olenina et al., 2006		cylinder	π/4 * d2 * h	4712.39	0,288*Vp^0,811	274.404	2.74404e-07
Delphineis minutissima	AU	Bacillariophyta (Stramenopiles)	7	22	4	4-10x18-26	Watanabe et al., 2013		flattened ellipsoid	π/6 * d1 * d2 * h	322.537	0,288*Vp^0,811	31.1781	3.11781e-08
Dictyocha (met skeletje)	AU	Flagellated cells	20			20-23	Olenina et al., 2006		half sphere	π/12 * d3	2094.4	0,216*Vp^0,939	283.745	2.83745e-07
Dictyocha (naakte vorm)	AU	Flagellated cells	20			20-24	Olenina et al., 2006		half sphere	π/12 * d4	2094.4	0,216*Vp^0,939	283.745	2.83745e-07
Dictyocha crux	AU	Flagellated cells	20			20-25	Olenina et al., 2006		half sphere	π/12 * d5	2094.4	0,216*Vp^0,939	283.745	2.83745e-07
Diploneis	AU	Bacillariophyta (Stramenopiles)					Nohe et al., 2018		fixed volumes		7000	0,288*Vp^0,811	378.24	3.7824e-07
Ditylum brightwellii	AU	Bacillariophyta (Stramenopiles)	125	20	20	20-22x120- 130m	Olenina et al., 2006		prism on triangle base	l * w * h / 2	25000	0,288*Vp^0,811	1061.99	1.06199e-06
Ebria tripartita	HET	Flagellated cells	30			17-43	Olenina et al., 2006		half sphere-30%	π/12 * d5*0,7	4948.01	0,216*Vp^0,939	636.098	6.36098e-07
Eucampia zodiacus	AU	Bacillariophyta (Stramenopiles)	25		20		Olenina et al., 2006		oval cylinder	π/4 *d1 * d2 * h	7853.98	0,288*Vp^0,811	415.251	4.15251e-07
Eunotogramma dubium	AU	Bacillariophyta (Stramenopiles)	40		30	Alfred Wegener Insitute ( Heincke Cruise HE430, North Sea | 2090)			oval cylinder	π/4 *d1 * d2 * h	28274.3	0,288*Vp^0,811	1173.47	1.17347e-06
Eutreptiella	AU	Flagellated cells	85		10	Length 64-115 µm	Karson et al., 2021		oval cylinder	π/4 *d1 * d2 * h	6675.88	0,216*Vp^0,939	842.689	8.42689e-07
Glenodinium danicum	MIX	Dinoflagellata (Alveolata)	20	20	13	18-22	Olenina et al., 2006		flatenned elipsoid	π/6 * d1 * d2 * h	2722.71	0,76*Vp^0,819	494.402	4.94402e-07
Guinardia delicatula	AU	Bacillariophyta (Stramenopiles)	40		12	10-15x30-50	Olenina et al., 2006		cylinder	π/4 * d2 * h	4523.89	0,288*Vp^0,811	265.469	2.65469e-07
Guinardia flaccida	AU	Bacillariophyta (Stramenopiles)	125		35	35x100-150	Olenina et al., 2006		cylinder	π/4 * d2 * h	120264	0,288*Vp^0,812	3796.49	3.79649e-06
Guinardia striata	AU	Bacillariophyta (Stramenopiles)	150		22		EOL, 2021		cylinder	π/4 * d2 * h	57019.9	0,288*Vp^0,813	2072.67	2.07267e-06
Gymnodiniaceae < 10 µm	MIX	Dinoflagellata (Alveolata)	7.5	5	4	<10	Olenina et al., 2006		flatenned elipsoid	π/6 * d1 * d2 * h	78.5398	0,76*Vp^0,819	27.0952	2.70952e-08
Gymnodiniaceae 10-30 µm	MIX	Dinoflagellata (Alveolata)	25	18	11	10-30	Olenina et al., 2006		flatenned elipsoid	π/6 * d1 * d2 * h	2591.81	0,76*Vp^0,819	474.849	4.74849e-07
Gymnodiniaceae 30-50 µm	MIX	Dinoflagellata (Alveolata)	45	35	23	30-50	Olenina et al., 2006		flatenned elipsoid	π/6 * d1 * d2 * h	18967.4	0,76*Vp^0,819	2423.83	2.42383e-06
Gymnodinium galeatum (Karlodinium veneficum)	CM	Dinoflagellata (Alveolata)	13		10	13-17x10	Olenina et al., 2006		rotational ellipsoid	π/6 * d2 * h	680.678	0,76*Vp^0,819	158.852	1.58852e-07
Gymnodinium verruculosum	AU	Dinoflagellata (Alveolata)					Nohe et al., 2018		fixed volumes		1000	0,76*Vp^0,819	217.678	2.17678e-07
Gyrodinium > 50 µm	HT	Dinoflagellata (Alveolata)	62	50	30	>50	Adjusted		flatenned elipsoid	π/6 * d1 * d2 * h	48694.7	0,76*Vp^0,819	5246.4	5.2464e-06
Gyrodinium 30-50 µm	HT	Dinoflagellata (Alveolata)	45	35	23	30-50	Adjusted		flatenned elipsoid	π/6 * d1 * d2 * h	18967.4	0,76*Vp^0,819	2423.83	2.42383e-06
Gyrodinium calyptoglyphe	HET	Dinoflagellata (Alveolata)					Nohe et al., 2018		fixed volumes	π/6 * d1 * d2 * h	30000	0,76*Vp^0,819	3528.38	3.52838e-06
Gyrodinium flagellare	AU	Dinoflagellata (Alveolata)					Nohe et al., 2018		fixed volumes	π/6 * d1 * d2 * h	30000	0,76*Vp^0,819	3528.38	3.52838e-06
Gyrodinium spirale	HET	Dinoflagellata (Alveolata)	85		25	70-100x18-22	Olenina et al., 2006		double cone	π/12 * d2 * h	13908.1	0,76*Vp^0,819	1879.96	1.87996e-06
Halosphaera flagellata	AU	Flagellated cells			50	50	Karson et al., 2021		Sphere	π/6 * d3	65449.8	0,216*Vp^0,939	7187.73	7.18773e-06
Heterocapsa minima/rotundata	AU	Dinoflagellata (Alveolata)	9		8	7-11	Nohe et al., 2018		fixed volumes	π/12 * d2 * h	234	0,76*Vp^0,819	66.2524	6.62524e-08
Heterocapsa sp.	CM	Dinoflagellata (Alveolata)					Nohe et al., 2018		fixed volumes		234	0,76*Vp^0,819	66.2524	6.62524e-08
Heterocapsa triquetra	CM	Dinoflagellata (Alveolata)	19.1846	14.8923	10.5846	17-19x11	Nohe et al., 2018		fixed volumes	π/12 * d2 * h	1670.17	0,76*Vp^0,819	331.325	3.31325e-07
Heterosigma akashiwo	CM	Dinoflagellata (Alveolata)			20	15-25	Olenina et al., 2006		Sphere	π/6 * d3	4188.79	0,76*Vp^0,819	703.565	7.03565e-07
Karenia mikimotoi	AU	Dinoflagellata (Alveolata)	27	22	22	18-37x14-35	Kraberg et al., 2010		flatenned elipsoid	π/6 * d1 * d2 * h	6842.39	0,76*Vp^0,819	1051.6	1.0516e-06
Katodinium glaucum	HET	Dinoflagellata (Alveolata)	24	12	16	34-36x26-30	Olenina et al., 2006		half cone + cut flattened ellipsoid	(π/24 * d12 * h1) + (π/6 * d1* d2 * h2)	3216.99	0,76*Vp^0,819	566.781	5.66781e-07
Khakista < 10 µm	AU	Bacillariophyta (Stramenopiles)	5		2		Adjusted		oval cylinder	π/4 *d1 * d2 * h	15.708	0,288*Vp^0,814	2.6881	2.6881e-09
Khakista < 10 µm b. < 50 µm l.	AU	Bacillariophyta (Stramenopiles)	25		5		Adjusted		oval cylinder	π/4 *d1 * d2 * h	490.874	0,288*Vp^0,815	43.8298	4.38298e-08
Khakista < 10 µm b. > 50 µm l.	AU	Bacillariophyta (Stramenopiles)	75		5		Adjusted		oval cylinder	π/4 *d1 * d2 * h	1472.62	0,288*Vp^0,816	106.835	1.06835e-07
Khakista > 10 µm b. > 50 µm l.	AU	Bacillariophyta (Stramenopiles)	75		20		Adjusted		oval cylinder	π/4 *d1 * d2 * h	23561.9	0,288*Vp^0,817	1012.18	1.01218e-06
Lauderia annulata	AU	Bacillariophyta (Stramenopiles)	55		40		Hasle et al., 1996		cylinder	π/4 * d2 * h	69115	0,288*Vp^0,811	2422.62	2.42262e-06
Lennoxia faveolata	AU	Bacillariophyta (Stramenopiles)	15		1.75		Olenina et al., 2006		rotational ellipsoid	π/6 * d2 * h	24.0528	0,288*Vp^0,811	3.79768	3.79768e-09
Leptocylindrus danicus	AU	Bacillariophyta (Stramenopiles)	78		5	5x70-80	Olenina et al., 2006		cylinder	π/4 * d2 * h	1531.53	0,288*Vp^0,811	110.288	1.10288e-07
Leptocylindrus minimus	AU	Bacillariophyta (Stramenopiles)	22		3	3x20-25	Olenina et al., 2006		cylinder	π/4 * d2 * h	155.509	0,288*Vp^0,811	17.2546	1.72546e-08
Leucocryptos marina	HET	Flagellated cells	10		5	5-6x10-14	Olenina et al., 2006		cone + half sphere	π/12 * d2 * h	65.4498	0,216*Vp^0,939	10.9545	1.09545e-08
Lithodesmium sp.	AU	Bacillariophyta (Stramenopiles)	40	40	30		Olenina et al., 2006		prism on triangle base	l * w * h / 2	24000	0,288*Vp^0,811	1027.41	1.02741e-06
Lithodesmium undulatum	AU	Bacillariophyta (Stramenopiles)	40	40	30		Olenina et al., 2006		prism on triangle base	l * w * h / 3	24000	0,288*Vp^0,811	1027.41	1.02741e-06
Mesoporos perforatus	AU	Bacillariophyta (Stramenopiles)	20.5		19.5	Length 14-27 µm, width 18-21 µm	Dodge et al., 1982		oval cylinder	π/4 *d1 * d2 * h	6122.28	0,216*Vp^0,939	339.296	3.39296e-07
Meuniera membranacea (Navicula membranacea)	AU	Bacillariophyta (Stramenopiles)	40		65	40-90x30-50	Kraberg et al., 2010		oval cylinder	π/4 *d1 * d2 * h	132732	0,288*Vp^0,811	4112.69	4.11269e-06
Micromonas pusilla	AU	Flagellated cells	2	1	1	1-3	Olenina et al., 2006		rotational ellipsoid	π/6 * d2 * h	1.0472	0,216*Vp^0,939	0.225559	2.25559e-10
Minutocellus scriptus	AU	Bacillariophyta (Stramenopiles)	36		3		Hasle, 1983		cylinder	π/4 * d2 * h	254.469	0,288*Vp^0,811	25.7254	2.57254e-08
Monoraphidium	AU	Flagellated cells	90		2.5	2.5x85-95	Olenina et al., 2006		double cone	π/12 * d2 * h	147.262	0,216*Vp^0,939	23.458	2.3458e-08
Myrionecta rubra	HET	Ciliophora (Alveolata)	60	40	50		EOS, 2021		Sphere	π/6 * d3	65449.8	*0.14	9162.98	9.16298e-06
Navicula	AU	Bacillariophyta (Stramenopiles)	35	10	10	10x30-40	Olenina et al., 2006		parallelepiped-40%	l * w * h *0,6	2100	0,288*Vp^0,811	142.466	1.42466e-07
Navicula distans	AU	Bacillariophyta (Stramenopiles)					Nohe et al., 2018		fixed volumes		2000	0,288*Vp^0,811	136.939	1.36939e-07
Noctiluca scintillans	HET	Dinoflagellata (Alveolata)	500			300-900	Olenina et al., 2006		Sphere	π/6 * d3	6.54498e+07	0,76*Vp^0,819	1.91444e+06	0.00191444
Oblea	HET	Dinoflagellata (Alveolata)	30			22-35	Olenina et al., 2006		sphere-10%	π/6 * d3*0,9	12723.5	0,76*Vp^0,819	1747.77	1.74777e-06
Odontella aurita	AU	Bacillariophyta (Stramenopiles)	44	18	35	40-50x30-40	Olenina et al., 2006		oval cylinder	π/4 *d1 * d2 * h	42333	0,288*Vp^0,811	1627.9	1.6279e-06
Odontella longicruris	AU	Bacillariophyta (Stramenopiles)					Nohe et al., 2018		fixed volumes		7838.5	0,288*Vp^0,811	414.587	4.14587e-07
Odontella rhombus	AU	Bacillariophyta (Stramenopiles)					Nohe et al., 2018		fixed volumes		7838.5	0,288*Vp^0,811	414.587	4.14587e-07
Odontella sinensis	AU	Bacillariophyta (Stramenopiles)	150	50	170	120-170x150-200	Olenina et al., 2006		oval cylinder	π/4 *d1 * d2 * h	3.4047e+06	0,288*Vp^0,811	57135.8	5.71358e-05
Oxyphysis oxytoxoides	HET	Dinoflagellata (Alveolata)	64	20		60 - 68x 16-24	EOS, 2021		rotational ellipsoid	π/6 * d2 * h	13404.1	0,76*Vp^0,819	1823.99	1.82399e-06
Oxytoxum adriaticum	AU	Dinoflagellata (Alveolata)	30	12		10-14x25-35	EOS, 2021		rotational ellipsoid	π/6 * d2 * h	2261.95	0,76*Vp^0,819	424.751	4.24751e-07
Paralia sulcata	AU	Bacillariophyta (Stramenopiles)					Nohe et al., 2018		fixed volumes		883.573	0,288*Vp^0,811	70.5984	7.05984e-08
Parlibellus delognei (Navicula sp.)	AU	Bacillariophyta (Stramenopiles)					Nohe et al., 2018		fixed volumes		2000	0,288*Vp^0,811	136.939	1.36939e-07
Peridiniales 10-30 µm	CM	Dinoflagellata (Alveolata)	20		20	10-30	Olenina et al., 2006	Nohe et al., 2018	double cone	π/12 * d2 * h	2094.4	0,76*Vp^0,819	398.805	3.98805e-07
Phaeocystis cel	AU	Flagellated cells	4.5			4-6	Rousseau et al., 2000		fixed volumes	fixed volumes	42.9416	0,216*Vp^0,939	15.91	1.591e-08
Phaeocystis flagellaat	AU	Flagellated cells	4.5			4-6	Rousseau et al., 2000		fixed volumes	fixed volumes	42.9416	0,216*Vp^0,939	10.8	1.08e-08
Phaeocystis kolonie	AU	Flagellated cells	4.5			4-6	Rousseau et al., 2000		fixed volumes	fixed volumes	42.9416	0,216*Vp^0,940	14.15	1.415e-08
Phalacroma rotundata	HET	Dinoflagellata (Alveolata)					Nohe et al., 2018		fixed volumes		41945.2	0,76*Vp^0,819	4642.92	4.64292e-06
Plagiogrammopsis vanheurckii	AU	Bacillariophyta (Stramenopiles)	30		10	25-35 um 5-10			oval cylinder	π/4 *d1 * d2 * h	2356.19	0,288*Vp^0,811	156.407	1.56407e-07
Plagiolemma distortum	AU	Bacillariophyta (Stramenopiles)	45	32	10	25.7–59.0 µm in length.22–25 striae in 10 µm.	Nézan et al., 2018		oval cylinder	π/4 *d1 * d2 * h	3534.29	0,288*Vp^0,811	217.303	2.17303e-07
Plagiotropis sp.	AU	Flagellated cells	135	21	10	Lenght 112-156 µm, wxidth 17-24 µm, strieae in 10um 16-19	Spaulding et al., 2022		oval cylinder	π/4 *d1 * d2 * h	10602.9	0,216*Vp^0,939	1301.15	1.30115e-06
Pleurosigma	AU	Bacillariophyta (Stramenopiles)							fixed volumes		34083.3	0,288*Vp^0,811	1365.48	1.36548e-06
Pleurosigmataceae	AU	Bacillariophyta (Stramenopiles)							fixed volumes		34083.3	0,288*Vp^0,811	1365.48	1.36548e-06
Podosira stelliger	AU	Bacillariophyta (Stramenopiles)					Nohe et al., 2018	Nohe et al., 2018	fixed volumes		65459.1	0,288*Vp^0,811	2318.17	2.31817e-06
Polykrikos	HET	Dinoflagellata (Alveolata)	75		55	150-50	Olenina et al., 2006		cylinder	π/4 * d2 * h	178187	0,76*Vp^0,819	15180.3	1.51803e-05
Proboscia alata	AU	Bacillariophyta (Stramenopiles)					Nohe et al., 2018		fixed volumes		64237.1	0,288*Vp^0,811	2283.01	2.28301e-06
Proboscia indica	AU	Bacillariophyta (Stramenopiles)					Nohe et al., 2018		fixed volumes		64237.1	0,288*Vp^0,811	2283.01	2.28301e-06
Prorocentrum	CM	Dinoflagellata (Alveolata)	19		15.5	20-22x12-19	Olenina et al., 2006		cone-10%	π/12 * d2 * h*0,9	1075.54	0,76*Vp^0,819	231.056	2.31056e-07
Prorocentrum balticum	CM	Dinoflagellata (Alveolata)	13			10-15	Olenina et al., 2006		sphere-10%	π/6 * d3*0,9	1035.31	0,76*Vp^0,819	223.953	2.23953e-07
Prorocentrum micans	CM	Dinoflagellata (Alveolata)	50	30	16.5	60-30	Olenina et al., 2006		flatenned elipsoid	π/6 * d1 * d2 * h	12959.1	0,76*Vp^0,819	1774.24	1.77424e-06
Prorocentrum triestinum	CM	Dinoflagellata (Alveolata)					Nohe et al., 2018	Nohe et al., 2018	fixed volumes		2428.55	0,76*Vp^0,819	450.208	4.50208e-07
Protaspis glans	HET	Flagellated cells			12		Skuja, 1939		Sphere	π/6 * d3	904.779	0,216*Vp^0,940	129.017	1.29017e-07
Protoperidinium > 50 µm	HET	Dinoflagellata (Alveolata)	60		55	>50	Olenina et al., 2006		(cone + half sphere)-25%	π/12 * d2 * h*0,75	35637.4	0,76*Vp^0,819	4062.8	4.0628e-06
Protoperidinium 10-30 µm	HET	Dinoflagellata (Alveolata)	20		20	10-30	Olenina et al., 2006		(cone + half sphere)-25%	π/12 * d2 * h*0,75	1570.8	0,76*Vp^0,819	315.091	3.15091e-07
Protoperidinium 30-50 µm	HET	Dinoflagellata (Alveolata)	40		40	30-50	Olenina et al., 2006		(cone + half sphere)-25%	π/12 * d2 * h*0,75	12566.4	0,76*Vp^0,819	1730.08	1.73008e-06
Protoperidinium bipes	HET	Dinoflagellata (Alveolata)	27.5		17.5	25-30x15-20	Dodge et al., 1982		half cone	π/24 * d2 * h	1102.42	0,76*Vp^0,819	235.774	2.35774e-07
Protoperidinium claudicans	HET	Dinoflagellata (Alveolata)	77.5		61.5	65-83x55-72	Kraberg et al., 2010		cone + half sphere	π/12 * d2 * h	76739.8	0,76*Vp^0,819	7614.57	7.61457e-06
Protoperidinium conicoides	HET	Dinoflagellata (Alveolata)	52		52	48-57	Olenina et al., 2006		cone + half sphere	π/12 * d2 * h	36811.1	0,76*Vp^0,819	4172.06	4.17206e-06
Protoperidinium conicum	HET	Dinoflagellata (Alveolata)	75		75	52-92	Olenina et al., 2006		cone + half sphere	π/12 * d2 * h	110447	0,76*Vp^0,819	10260.2	1.02602e-05
Protoperidinium granii	HET	Dinoflagellata (Alveolata)	38		30	27-45	Olenina et al., 2006		(cone + half sphere)-20%	π/12 * d2 * h*0,8	7162.83	0,76*Vp^0,819	1091.76	1.09176e-06
Protoperidinium mite	HET	Dinoflagellata (Alveolata)					Nohe et al., 2018	Nohe et al., 2018	fixed volumes	π/6*d^2*z	22216.9	0,76*Vp^0,819	2758.97	2.75897e-06
Protoperidinium ovatum	HET	Dinoflagellata (Alveolata)	62	60			Balech, 1976		flatenned elipsoid	π/6*d^2*z	120763	0,76*Vp^0,819	11038.7	1.10387e-05
Protoperidinium steinii	HET	Dinoflagellata (Alveolata)	50		32		Hansen & Larsen, 1992		(cone + half sphere)-25%	π/12 * d2 * h*0,75	10053.1	0,76*Vp^0,819	1441.11	1.44111e-06
Protoperidinium subinerme	HET	Dinoflagellata (Alveolata)	55		45	60-40	Olenina et al., 2006		(cone + half sphere)-25%	π/12 * d2 * h*0,75	21868.4	0,76*Vp^0,819	2723.48	2.72348e-06
Pseudo-nitzschia	AU	Bacillariophyta (Stramenopiles)	80	4	2	Length 25 - 160 μm, width 0.5 -8 μm	EOS, 2021		parallelepiped-20%	l * w * h *0,8	512	0,288*Vp^0,811	45.3535	4.53535e-08
Pseudo-nitzschia delicatissima complex	AU	Bacillariophyta (Stramenopiles)	50	2	3	2x40-60	Olenina et al., 2006		parallelepi ped-10%	l * w * h *0,9	240	0,288*Vp^0,811	24.5326	2.45326e-08
Pseudo-nitzschia fraudulenta	AU	Bacillariophyta (Stramenopiles)					Nohe et al., 2018		fixed volumes		4708	0,288*Vp^0,811	274.197	2.74197e-07
Pseudo-nitzschia pungens complex	AU	Bacillariophyta (Stramenopiles)	120	5.5	5	5-6x120-130	Olenina et al., 2006		parallelepi ped-20%	l * w * h *0,8	2640	0,288*Vp^0,811	171.519	1.71519e-07
Pseudo-nitzschia turgidula complex	AU	Bacillariophyta (Stramenopiles)					Nohe et al., 2018		fixed volumes		2000	0,288*Vp^0,811	136.939	1.36939e-07
Pseudopodosira westii (Melosira sp.)	AU	Bacillariophyta (Stramenopiles)					Nohe et al., 2018		fixed volumes		3000	0,288*Vp^0,811	190.256	1.90256e-07
Pterosperma phycoma	AU	Flagellated cells	15			15	Olenina et al., 2006		Sphere	π/6 * d3	1767.15	0,216*Vp^0,939	241.904	2.41904e-07
Pyramimonas < 10 µm	AU	Flagellated cells	5	3	5	8-10x6	Olenina et al., 2006		trapezoid	1/2*h*w*(l1+l2)	60	0,216*Vp^0,939	10.0957	1.00957e-08
Pyramimonas > 10 µm	AU	Flagellated cells	9	5.6	9	10-12x9	Olenina et al., 2006		trapezoid	1/2*h*w*(l1+l2)	367.92	0,216*Vp^0,939	55.4238	5.54238e-08
Pyramimonas longicauda	AU	Flagellated cells	25	10	12	10-15x25	Olenina et al., 2006		trapezoid	1/2*h*w*(l1+l2)	2750	0,216*Vp^0,939	366.427	3.66427e-07
Raphidophyceae	AU	Flagellated cells	50	20	10	50-100	Olenina et al., 2006		oval cylinder	1/2*h*w*(l1+l2)	15000	0,216*Vp^0,939	1802.2	1.8022e-06
Rhaphoneis amphiceros	AU	Bacillariophyta (Stramenopiles)					Nohe et al., 2018		fixed volumes		8232.14	0,288*Vp^0,811	431.393	4.31393e-07
Rhizosolenia hebatata	AU	Bacillariophyta (Stramenopiles)					Nohe et al., 2018		fixed volumes		47873.9	0,288*Vp^0,811	1798.67	1.79867e-06
Rhizosolenia imbricata	AU	Bacillariophyta (Stramenopiles)	400		25	50-650x5-40	Nohe et al., 2018		fixed volumes	fixed volumes	45935	0,288*Vp^0,811	1739.37	1.73937e-06
Rhizosolenia pungens	AU	Bacillariophyta (Stramenopiles)	475		15	15x400-550	Olenina et al., 2006		cylinder	π/4 * d2 * h	83939.4	0,288*Vp^0,811	2836.15	2.83615e-06
Rhizosolenia robusta	AU	Bacillariophyta (Stramenopiles)	700		250	Size: Diameter = 48-400 µm, cell length 0.5 -1 mm	Karson et al., 2021		cylinder	π/4 * d2 * h	3.43612e+07	0,288*Vp^0,811	372515	0.000372515
Rhizosolenia setigera	AU	Bacillariophyta (Stramenopiles)	400		25	50-600x5-50	Olenina et al., 2006		cylinder	π/4 * d2 * h	196350	0,288*Vp^0,811	5649.89	5.64989e-06
Scrippsiella	CM	Dinoflagellata (Alveolata)					Nohe et al., 2018		fixed volumes		5505	0,76*Vp^0,819	880.023	8.80023e-07
Skeletonema cf. costatum	AU	Bacillariophyta (Stramenopiles)	19		7	7x15-25	Olenina et al., 2006		cylinder	π/4 * d2 * h	23.2333	0,288*Vp^0,811	3.6924	3.6924e-09
Stephanopyxis turris	AU	Bacillariophyta (Stramenopiles)					Nohe et al., 2018		fixed volumes		28260	0,288*Vp^0,811	1172.99	1.17299e-06
Telonema subtilis	HET	Flagellated cells	8		5.5	5-6x8	Olenina et al., 2006		cone + half sphere	π/12 * d2 * h	63.3555	0,216*Vp^0,939	10.625	1.0625e-08
Thalassionema frauenfeldii	AU	Bacillariophyta (Stramenopiles)					Olenina et al., 2006		fixed volumes		500	0,288*Vp^0,811	44.4895	4.44895e-08
Thalassionema nitzschioides	AU	Bacillariophyta (Stramenopiles)	65	4	4	4x50-80	Olenina et al., 2006		parallelepiped	l * w * h	1040	0,288*Vp^0,811	80.5762	8.05762e-08
Thalassiosira < 10 µm	AU	Bacillariophyta (Stramenopiles)	5		8	>10	Olenina et al., 2006		cylinder	π/4 * d2 * h	251.327	0,288*Vp^0,811	25.4675	2.54675e-08
Thalassiosira 10-30 µm	AU	Bacillariophyta (Stramenopiles)	10		20	10-30	Olenina et al., 2006		cylinder	π/4 * d2 * h	3141.59	0,288*Vp^0,811	197.506	1.97506e-07
Thalassiosira 30-80 µm	AU	Bacillariophyta (Stramenopiles)	20		60	30-80	Olenina et al., 2006		cylinder	π/4 * d2 * h	56548.7	0,288*Vp^0,811	2058.77	2.05877e-06
Thalassiosira anguste-lineata	AU	Bacillariophyta (Stramenopiles)	19.95		52.5	50-55	Olenina et al., 2006		cylinder	π/4 * d2 * h	43186.8	0,288*Vp^0,811	1654.48	1.65448e-06
Torodinium robustum	CM	Dinoflagellata (Alveolata)	42	22	10	22x42	Olenina et al., 2006		flatenned elipsoid	π/6 * d1 * d2 * h	4838.05	0,76*Vp^0,819	791.697	7.91697e-07
Tripos fusus	CM	Dinoflagellata (Alveolata)	25			15-35	Olenina et al., 2006		fixed volumes	fixed volumes	18000	0,76*Vp^0,819	2322.1	2.3221e-06
Tripos horridus [1]	AU	Dinoflagellata (Alveolata)					Nohe et al., 2018		fixed volumes		44278.1	0,76*Vp^0,819	4853.36	4.85336e-06
Tryblionella acuminata	AU	Bacillariophyta (Stramenopiles)					Nohe et al., 2018		fixed volumes		5348	0,288*Vp^0,811	304.057	3.04057e-07
Warnowia sp.	HET	Dinoflagellata (Alveolata)	40	40			Guiry, 2010		Sphere	π/6 * d3	33510.3	0,76*Vp^0,819	3863.09	3.86309e-06

## Sheet: References
						Citation	References
						Olenina et al., 2006	Olenina, I. (2006). Biovolumes and size-classes of phytoplankton in the Baltic Sea.
						Kraberg et al., 2010	Kraberg, A., Baumann, M., & Dürselen, C. D. (2010). Coastal phytoplankton: photo guide for Northern European seas. Pfeil.
						Nézan et al., 2018	Nézan, E., Bilien, G., Boulben, S., Mertens, K. N., & Chomérat, N. (2018). Description and phylogenetic position of Plagiolemma distortum sp. nov., a new raphid diatom (Bacillariophyceae) from French coastal waters. Diatom Research, 33(1), 13-24.
						Dodget et al., 1982	Dodge, J. D. 1982. Marine Dinoflagellates of the British Isles. Her Majesty’s Stationery Office, London. 303 pp. and Drebes, G. 1974. Marines Phytoplankton, Eine Auswahl der Helgoländer Planktonalgen (Diatomeen, Peridineen). Georg Thieme Verlag, Stuttgart. 186 pp.
						EOL, 2021	Encyclopedia of Life (EOL). Guinardia striata (Stolterfoth) G. R. Hasle. http://www.eol.org/pages/907115. Accessed 30 Jul 2021
						EOS, 2021	EOS - Phytoplankton Encyclopedia Project (ubc.ca). Accessed Jul 2021
						Karlson et al., 2020	Karlson, B., Andreasson, A., Johansen, M., Karlberg, M., Loo, A., Skjevik, A-T., 2020. Nordic Microalgae. World-wide electronic publication, http://nordicmicroalgae.org.
						Rousseau et al., 2000	Rousseau, V., Mathot, S. & Lancelot, C. Calculating carbon biomass ofPhaeocystis sp. from microscopic observations. Mar. Biol. 107, 305–314 (1990). https://doi.org/10.1007/BF01319828
						Spaulding et al., 2022	Spaulding et al. 2022. Diatoms.org: supporting taxonomists, connecting communities. Diatom Research. doi:10.1080/0269249X.2021.2006790
						Bosak et al., 2015	Sunčica Bosak, Luka Šupraha, Deepak Nanjappa, Wiebe H.C.F. Kooistra & Diana Sarno (2015) Morphology and phylogeny of four species from the genus Bacteriastrum (Bacillariophyta), Phycologia, 54:2, 130-148, DOI: 10.2216/14-62
						Watanabe et al., 2013	Tsuyoshi Watanabe, Jiro Tanaka, Geraldine Reid, Misato Kumada & Tamotsu Nagumo (2013) Fine structure of Delphineis minutissima and D. surirella (Rhaphoneidaceae), Diatom Research, 28:4, 445-453, DOI: 10.1080/0269249X.2013.833553
						Nohe et al., 2018	Nohe, A., Knockaert, C., Gof, A., Dewitte, E., and Cauwer, K. De (2018). Data Descriptor : Marine phytoplankton community composition data from the Belgian part of the North Sea , 1968 – 2010. 1–9.
						Balech, 1976	Balech, E. (1976). Sur quelques Protoperidinium (Dinoflagellata) du golfe du Lion. Vie et Milieu, 26, 27-46.
						Gmekin, 1797	Gmelin, J. F. (1791). Systema naturæ: per Regna tria naturae, secundum classes, ordines, genera, species, cum characteribus, differentiis, synonomis, locis (Vol. 2, No. 2). Beer.
						Skuja, 1939	Skuja, H. (1939). Beitrag zur Algenflora Lettlands II. Acta Horti Botanici Universitatis Latviensis 11/12: 41-169.
						Hansen & Larsen, 1992	Hansen, G. & Larsen, J. 1992. Dinoflagellater i danske farvande. In: Thomsen, H. A. (ed.) Plankton i de indre danske farvande. Havforskning fra Miljøstyrelsen, Copenhagen, p. 45-155.
						Hasle et al., 1996	Hasle, G. R., Syvertsen, E. E., Steidinger, K. A., Tangen, K., & Tomas, C. R. (1996). Identifying marine diatoms and dinoflagellates. Elsevier.
						Hasle, 1983	Hasle, G. R. (1983). Thalassiosira punctigera (Castr.) comb, nov., a widely distributed marine planktonic diatom. Nordic Journal of Botany, 3(5), 593-608.
						Guiry, 2010	Guiry, M. D. (2010). AlgaeBase. World-wide electronic publication, National university of Ireland, Galway. http://www. algaebase. org/.
						Marine Species Identification Portal, 2021	Marine Species Identification Portal 2021 Cochlodinium polykrikoides. [Accessed 01/2021].
						Kociolek et al., 2020	Kociolek, J.P.; Balasubramanian, K.; Blanco, S.; Coste, M.; Ector, L.; Liu, Y.; Kulikovskiy, M.; Lundholm, N.; Ludwig, T.; Potapova, M.; Rimet, F.; Sabbe, K.; Sala, S.; Sar, E.; Taylor, J.; Van de Vijver, B.; Wetzel, C.E.; Williams, D.M.; Witkowski, A.; Witkowski, J. (2020). DiatomBase. Chaetoceros pseudocurvisetus Mangin, 1910. Accessed through: World Register of Marine Species at: http://www.ma…
						Daugbjerg et al., 2000	Daugbjerg, N., Hansen, G., Larsen, J., & Moestrup, Ø. (2000). Phylogeny of some of the major genera of dinoflagellates based on ultrastructure and partial LSU rDNA sequence data, including the erection of three new genera of unarmoured dinoflagellates. Phycologia, 39(4), 302-317.
						Hendey et al. 1954	Hendey, N. I. (1954). A preliminary check-list of British marine diatoms. Journal of the marine biological association of the United Kingdom, 33(2), 537-560.
						Rines & Hargraves, 1990	Rines, J. E. B., & Hargraves, P. E. (1990). Morphology and taxonomy of Chaetoceros compressus Lauder var. hirtisetus var. nova, with preliminary consideration of closely related taxa. Diatom Research, 5(1), 113-127.
						Hendey et al. 1964	Hendey, N. I. (1964). Bacillariophyceae (diatoms). An introductory account of the smaller algae of British coastal waters.
